# Supplementary material for: Design strategy and molecular level understanding: hole transport materials with suitable transition dipole orientation for OLEDs
Source: Royal Society of Chemistry journal article supplement (doi:10.1039/d3me00127j), 2024-01-01
Supplement: d3me00127j1.pdf [file d3me00127j1.pdf]

## **Supplementary Information**

### **Design Strategy and Molecular Level Understanding: Hole Transport Materials with Suitable Transition Dipole Orientation for OLEDs**

Krishan Kumar, Sunil Kumar, Anirban Karmakar, Dipanshu Sharma, Feng-Rong Chen,  
Mangey Ram Nagar, Jwo-Huei Jou, Subrata Banik, Subrata Ghosh

## Contents

|                                                                        |         |
|------------------------------------------------------------------------|---------|
| <b>1. General</b> .....                                                | S3      |
| <b>2. Synthesis scheme and procedures</b> .....                        | S4-S7   |
| <b>3. Copies of <sup>1</sup>H and <sup>13</sup>C NMR spectra</b> ..... | S8-S12  |
| <b>4. HRMS</b> .....                                                   | S13-S17 |
| <b>5. Theoretical and experimental results</b> .....                   | S18-S19 |
| <b>6. TD-DFT analysis</b> .....                                        | S20-S28 |
| <b>7. Cartesian coordinates</b> .....                                  | S29-S43 |
| <b>8. Cyclic voltammetry graphs</b> .....                              | S44-S46 |
| <b>9. TGA/DSC graphs</b> .....                                         | S47-S48 |
| <b>10. Single crystal analysis</b> .....                               | S49-S52 |
| <b>11. Hole-only device fabrication</b> .....                          | S53     |
| <b>12. References</b> .....                                            | S54-S55 |

## 1. General

| General information on instrumentation and experimental work           |                                                                                                                                                                                                                                                                   |
|------------------------------------------------------------------------|-------------------------------------------------------------------------------------------------------------------------------------------------------------------------------------------------------------------------------------------------------------------|
| Instrument                                                             | Characterization                                                                                                                                                                                                                                                  |
| Jeol EXC NMR spectrometer                                              | Both, proton ( $^1\text{H}$ ) and carbon ( $^{13}\text{C}$ ) NMR Spectra.                                                                                                                                                                                         |
| Bruker Maxix Impact HD instrument                                      | Experimentally evaluated mass (HRMS) of the compounds.<br>The theoretical mass of the compounds was calculated using isotope pattern software.                                                                                                                    |
| Shimadzu UV-2450 and Carry Eclips Fluorescence Spectrometer<br>Agilent | The absorption and photoluminescence studies were carried out using 5 $\mu\text{M}$ in DCM solution. Excitation wavelengths for <b>PhMeO</b> , <b>TolPz</b> , <b>PhPz</b> , <b>PhMePz</b> , and <b>TolMePz</b> were 327, 327, 329, 326, and 327 nm, respectively. |
| NETZSCH STA448 F1 JUPITOR                                              | Thermogravimetric analysis (TGA) was performed at a heating rate of 10 $^{\circ}\text{C}/\text{min}$ under $\text{N}_2$ atmosphere.                                                                                                                               |
| Perkin Elmer DSC 8000 instruments                                      | Differential scanning calorimetry (DSC) analysis was performed at a heating rate of 10 $^{\circ}\text{C}/\text{min}$ under $\text{N}_2$ atmosphere.                                                                                                               |
| Metrohm Auto lab                                                       | Cyclic Voltammetry (CV) analysis                                                                                                                                                                                                                                  |
| Agilent Technologies X-ray diffractometer                              | Single crystal diffraction studies                                                                                                                                                                                                                                |

The starting substrates **MePz**, **MePzCHO**, and **HPzCHO** were synthesized following literature reported procedure.<sup>1</sup> The final compounds were synthesized following a modified literature procedure.<sup>2</sup>

## 2. Synthesis scheme and procedures:

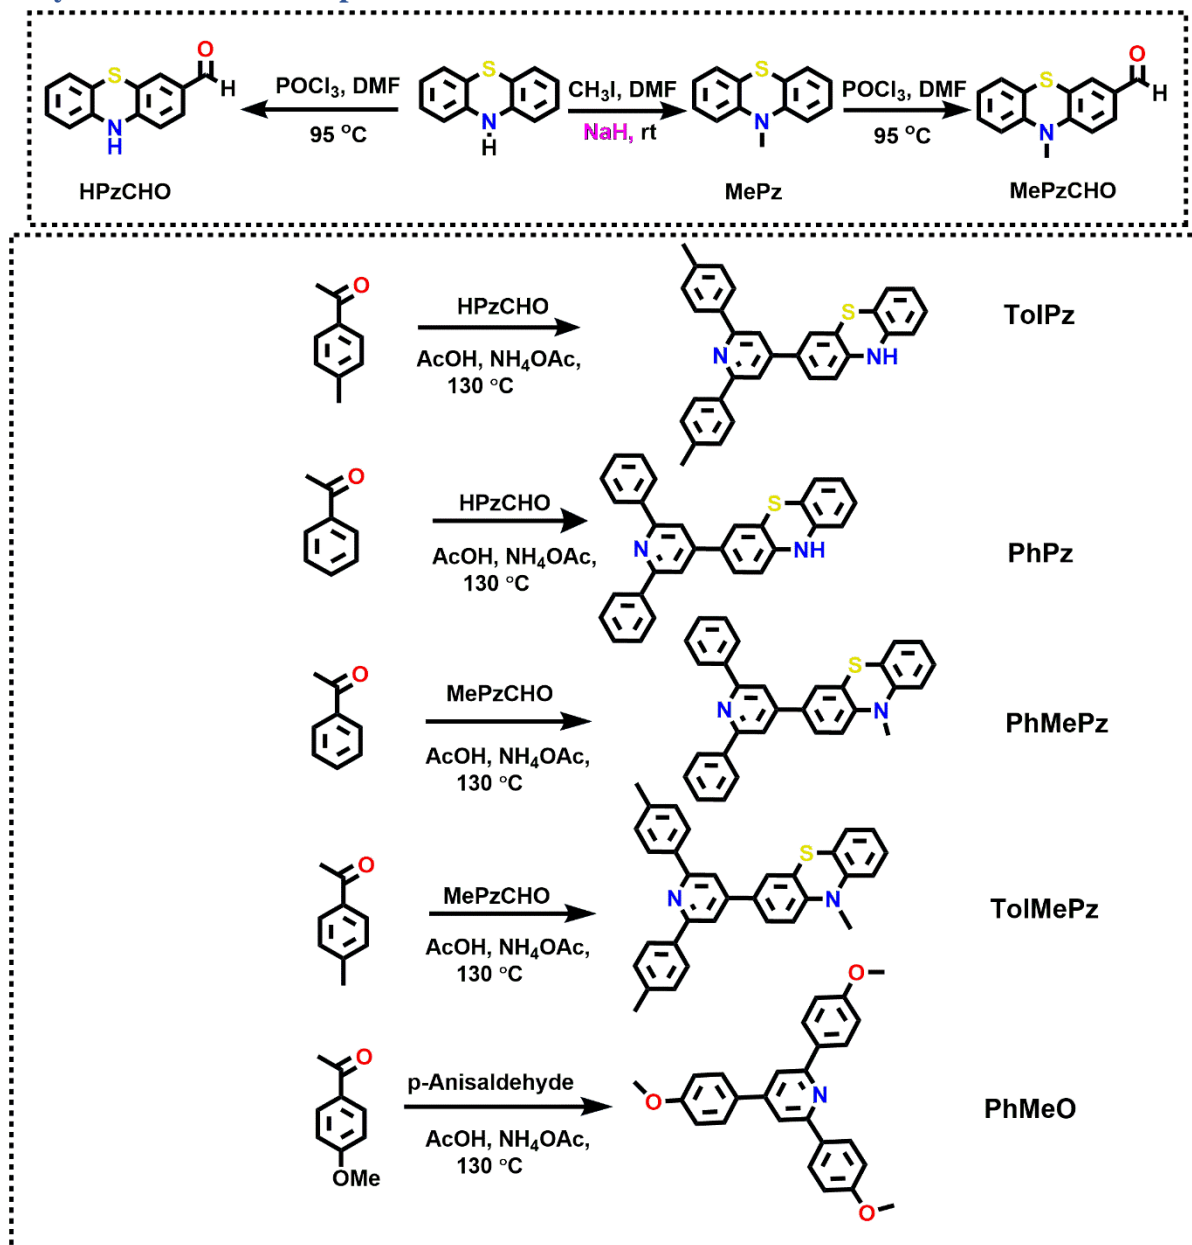

Scheme S1. Synthesis routes for PhMeO, PhPz, PhMePz, TolPz and TolMePz

*Synthesis procedure for PhMeO<sup>3</sup>:*

A mixture of 4-methoxyacetophenone (3 eq), 4-methoxybenzaldehyde (1 eq), AcOH (15 ml), and ammonium acetate (8 eq) in 100 ml round-bottom flask was refluxed at 130 °C for 12h. After completion of the reaction, it was quenched with water and extracted with DCM. Finally, the DCM extract was washed with water followed by drying over sodium sulfate. The organic solvent was evaporated using rota-evaporator and the crude solid was purified by precipitation in methanol. Yield: 60%; <sup>1</sup>H NMR (500 MHz, CDCl<sub>3</sub>): 8.13 (d, *J* = 8.90 Hz, 4H), 7.70 (s, 2H), 7.66 (d, *J* = 8.25 Hz, 2H), 7.01 (d, *J* = 8.25 Hz, 6H), 3.85 and 3.84 (s, 9H); <sup>13</sup>C NMR (125 MHz, CDCl<sub>3</sub>): 160.34, 160.25, 156.78, 149.32, 132.37, 131.45, 128.27, 128.21, 115.10, 114.37, 113.92, 55.32, 55.29; HRMS (ESI); Calculated for C<sub>26</sub>H<sub>24</sub>NO<sub>3</sub> [M+H]<sup>+</sup>: 398.1750, found: 398.1756.

*Synthesis procedure for TolPz:*

A mixture of 4-methylacetophenone (3 eq), **HPzCHO** (1 eq), AcOH (15 ml), and ammonium acetate (8 eq) in 100 ml round-bottom flask was refluxed at 130 °C for 12h. After completion of the reaction, it was quenched with water and extracted with DCM. Finally, the DCM extract was washed with water followed by drying over sodium sulfate. Column chromatography was used to purify the crude product using 6% ethyl acetate-hexane mixture as the eluent; Yellow color solid; Yield: 40%; <sup>1</sup>H NMR (500 MHz, DMSO-*d*<sub>6</sub>): 8.89 (s, 1H), 8.21 (d, *J* = 6.85 Hz, 4H), 8.03 (s, 2H), 7.70-7.68 (m, 2H), 7.31 (d, *J* = 6.9 Hz, 4H), 7.02-6.94 (m, 2H), 6.85-6.72 (m, 3H), 2.36 (s, 6H); <sup>13</sup>C NMR (125 MHz, DMSO-*d*<sub>6</sub>): 156.20, 148.08, 142.88, 141.26, 138.53, 136.21, 130.92, 129.22, 127.64, 126.76, 126.61, 126.27, 124.86, 124.73, 122.11, 117.22, 116.16, 114.61, 114.57, 20.89; HRMS (ESI); Calculated for C<sub>31</sub>H<sub>23</sub>N<sub>2</sub>S [M-H]<sup>-</sup>: 455.1576, found: 455.1570.

*Synthesis procedure for PhPz:*

A mixture of acetophenone (3 eq), **HPzCHO** (1 eq), AcOH (15 ml), and ammonium acetate (8 eq.) in 100 ml round-bottom flask was refluxed at 130 °C for 12h. After completion of the reaction, it was quenched with water and extracted with DCM. Finally, the DCM extract was washed with water followed by drying over sodium sulfate. Column chromatography was used to purify the crude product using 8% ethyl acetate-hexane mixture as the eluent; Yellow color solid; Yield: 45%; <sup>1</sup>H NMR (500 MHz, DMSO-*d*<sub>6</sub>): 8.89 (s, 1H), 8.32 (d, *J* = 6.85 Hz, 4H), 8.11 (s, 2H), 7.74-7.71 (m, 2H), 7.53-7.45 (m, 6H), 7.02-6.94 (m, 2H), 6.84-6.72 (m, 3H); <sup>13</sup>C NMR (125 MHz, DMSO-*d*<sub>6</sub>): 156.87, 148.81, 143.49, 141.73, 139.46, 131.27, 129.65, 129.18, 128.20, 127.47, 127.23, 126.83, 125.46, 122.69, 117.77, 116.67, 155.82, 115.16, 115.11; HRMS (ESI): Calculated for C<sub>29</sub>H<sub>21</sub>N<sub>2</sub>S [M+H]<sup>+</sup>: 429.1419, found: 429.1414.

*Synthesis procedure for PhMePz:<sup>4</sup>*

A mixture of acetophenone (3 eq), **MePzCHO** (1 eq), AcOH (15 ml), and ammonium acetate (8 eq) in 100 ml round-bottom flask was refluxed at 130 °C for 12h. After completion of the reaction, it was quenched with water and extracted with DCM. Finally, the DCM extract was washed with water followed by drying over sodium sulfate. Column chromatography was used to purify the crude product using 5% ethyl acetate-hexane mixture as the eluent; Yellow color solid; Yield: 40%; <sup>1</sup>H NMR (500 MHz, CDCl<sub>3</sub>): 8.16-8.15 (m, 4H), 7.75 (s, 2H), 7.49-7.39 (m, 8H), 7.19-7.12 (m, 2H), 6.93-6.90 (m, 1H), 6.79-6.75 (m, 2H), 3.29 (s, 3H); <sup>13</sup>C NMR (125 MHz, CDCl<sub>3</sub>): 157.32, 148.57, 146.41, 145.06, 139.47, 132.71, 128.93, 128.60, 127.56, 127.14, 127.03, 126.11, 125.34, 124.07, 122.74, 122.59, 116.08, 114.23, 114.18, 35.26; HRMS (ESI): Calculated for C<sub>30</sub>H<sub>23</sub>N<sub>2</sub>S [M+H]<sup>+</sup>: 443.1576, found: 443.1579.

*Synthesis procedure for TolMePz:*

A mixture of 4-methylacetophenone (3 eq), **MePzCHO** (1 eq) AcOH (15 ml) and ammonium acetate (8 eq.) in 100 ml round-bottom flask was refluxed at 130 °C for 12h. After completion

of the reaction, it was quenched with water and extracted with DCM. Finally, the DCM extract was washed with water followed by drying over sodium sulfate. Column chromatography was used to purify the crude product using 3% ethyl acetate-hexane mixture as the eluent; Yellow color solid; Yield: 45%;  $^1\text{H}$  NMR (500 MHz,  $\text{CDCl}_3$ ): 7.98 (d,  $J = 6.85$  Hz, 4H), 7.65 (s, 2H), 7.40 (s, 2H), 7.20 (d,  $J = 7.55$  Hz, 4H), 7.08-7.06 (m, 2H), 6.87-6.84 (m, 1H), 6.77-6.71 (m, 2H), 3.27 (s, 3H), 2.32 (s, 6H);  $^{13}\text{C}$  NMR (125 MHz,  $\text{CDCl}_3$ ): 157.30, 148.49, 146.40, 145.18, 138.86, 136.83, 133.08, 129.33, 127.59, 127.20, 126.93, 126.17, 125.44, 124.10, 122.76, 122.70, 115.58, 114.27, 114.20, 35.35, 21.29; HRMS (ESI): Calculated for  $\text{C}_{32}\text{H}_{27}\text{N}_2\text{S}$   $[\text{M}+\text{H}]^+$ : 471.1889, found: 471.1889.

### 3. Copies of $^1\text{H}$ and $^{13}\text{C}$ NMR spectra

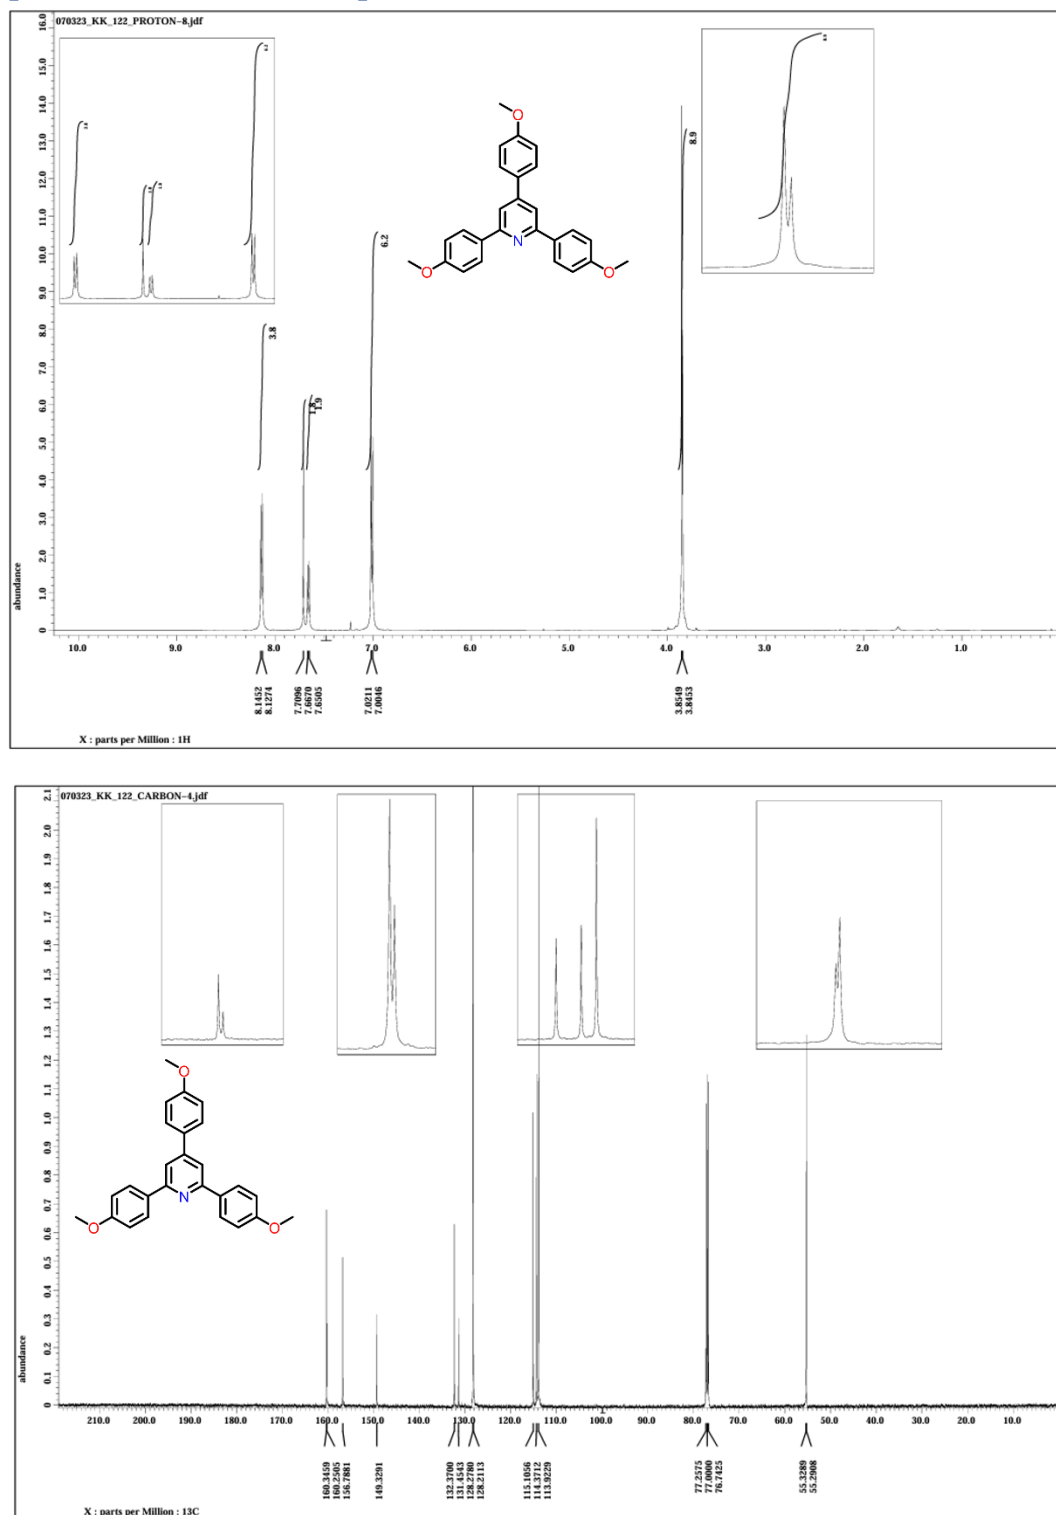

Fig. S1.  $^1\text{H}$  and  $^{13}\text{C}$  NMR spectra of PhMeO



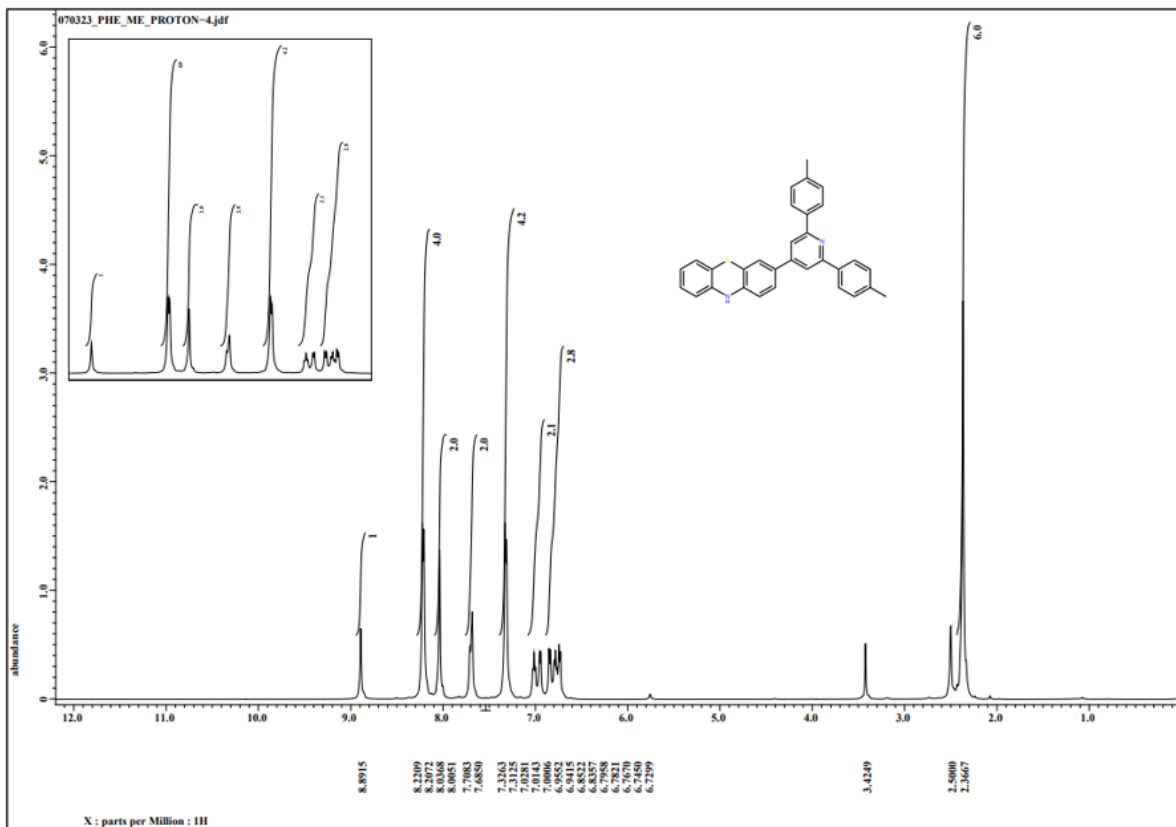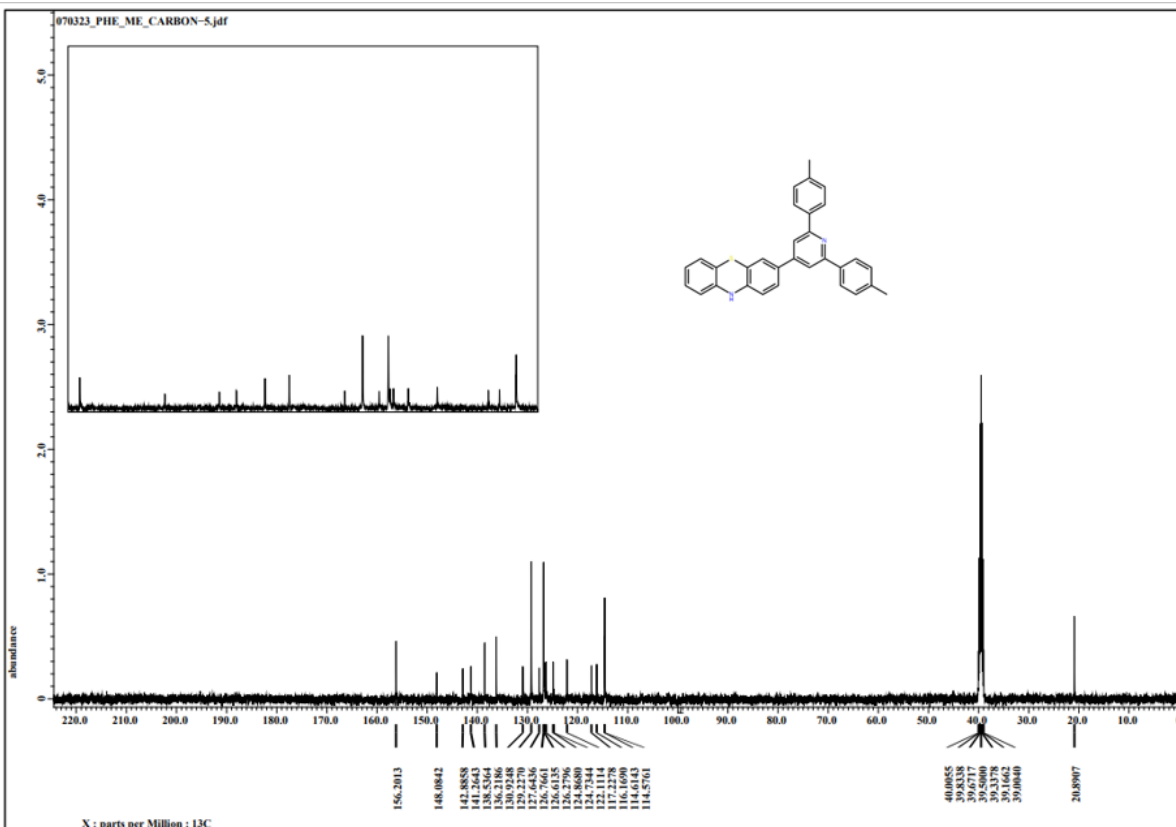

Fig. S2.  $^1\text{H}$  and  $^{13}\text{C}$  NMR spectra of TolPz

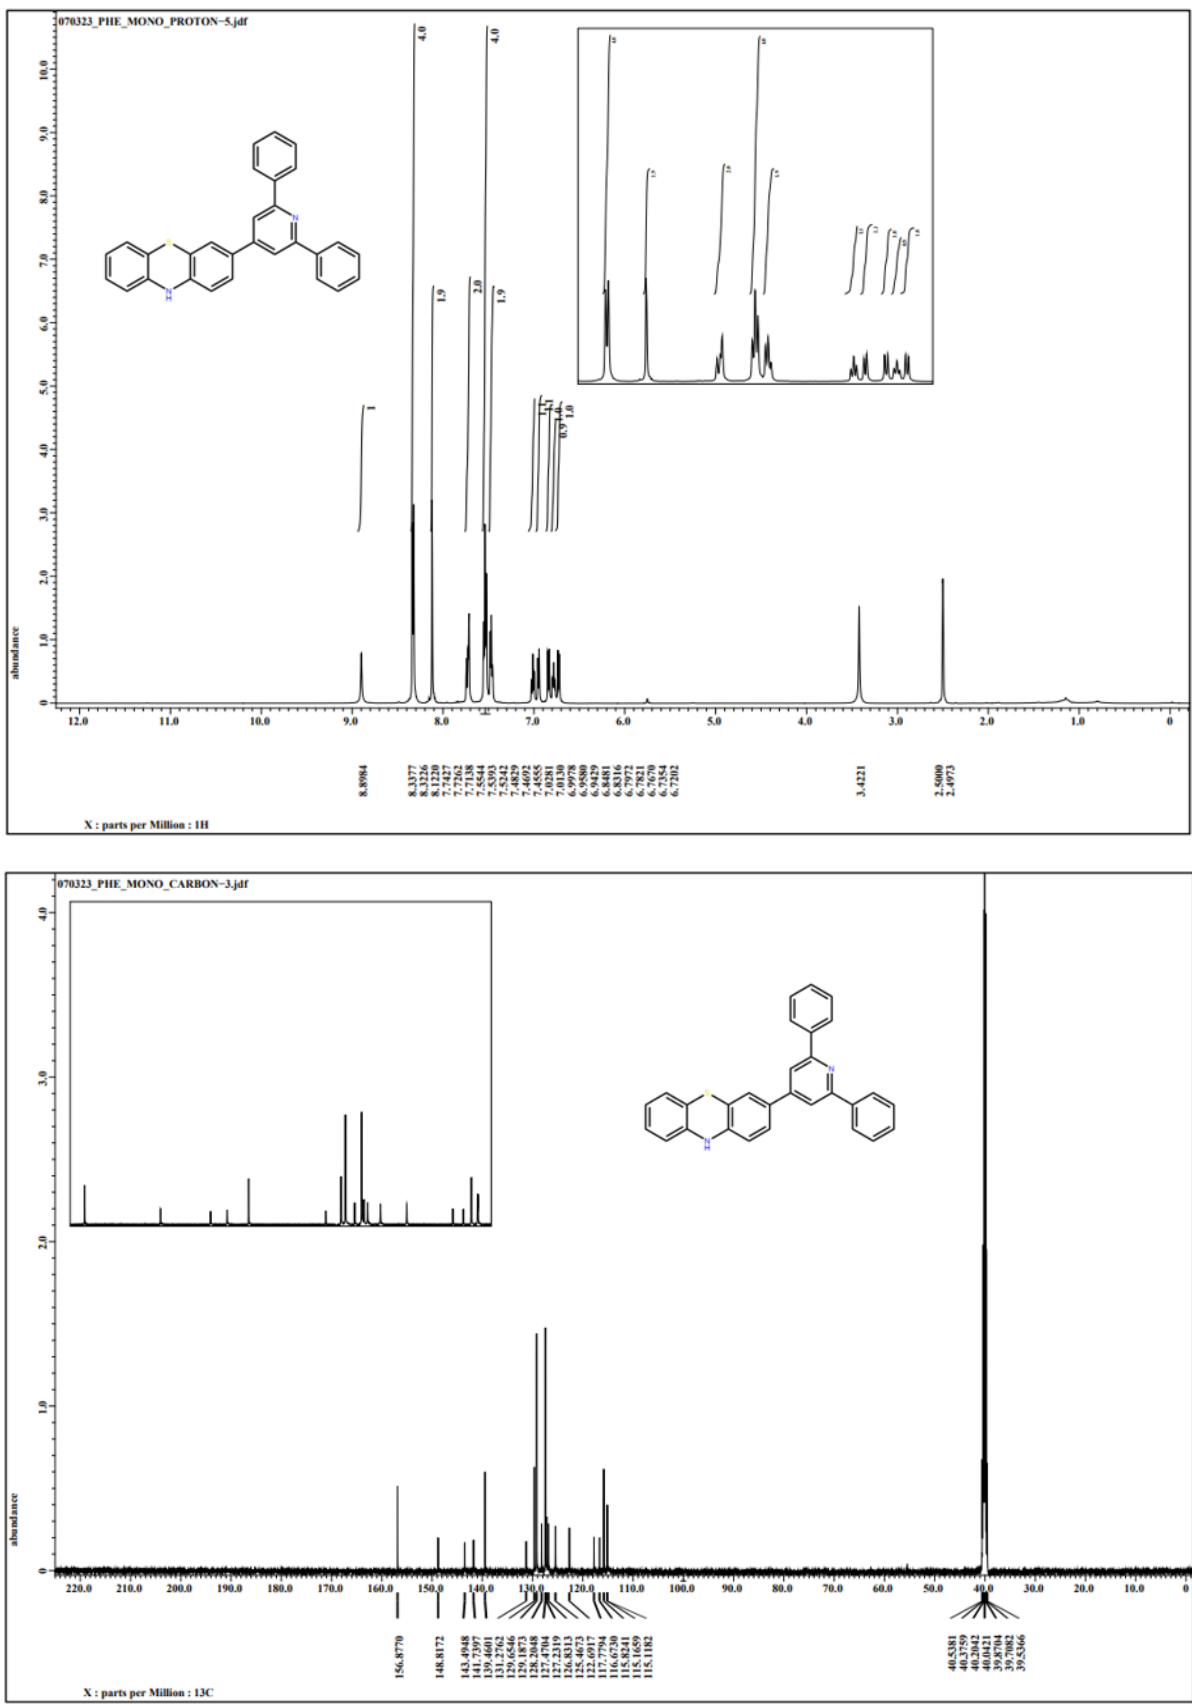

Fig. S3. <sup>1</sup>H and <sup>13</sup>C NMR spectra of PhPz

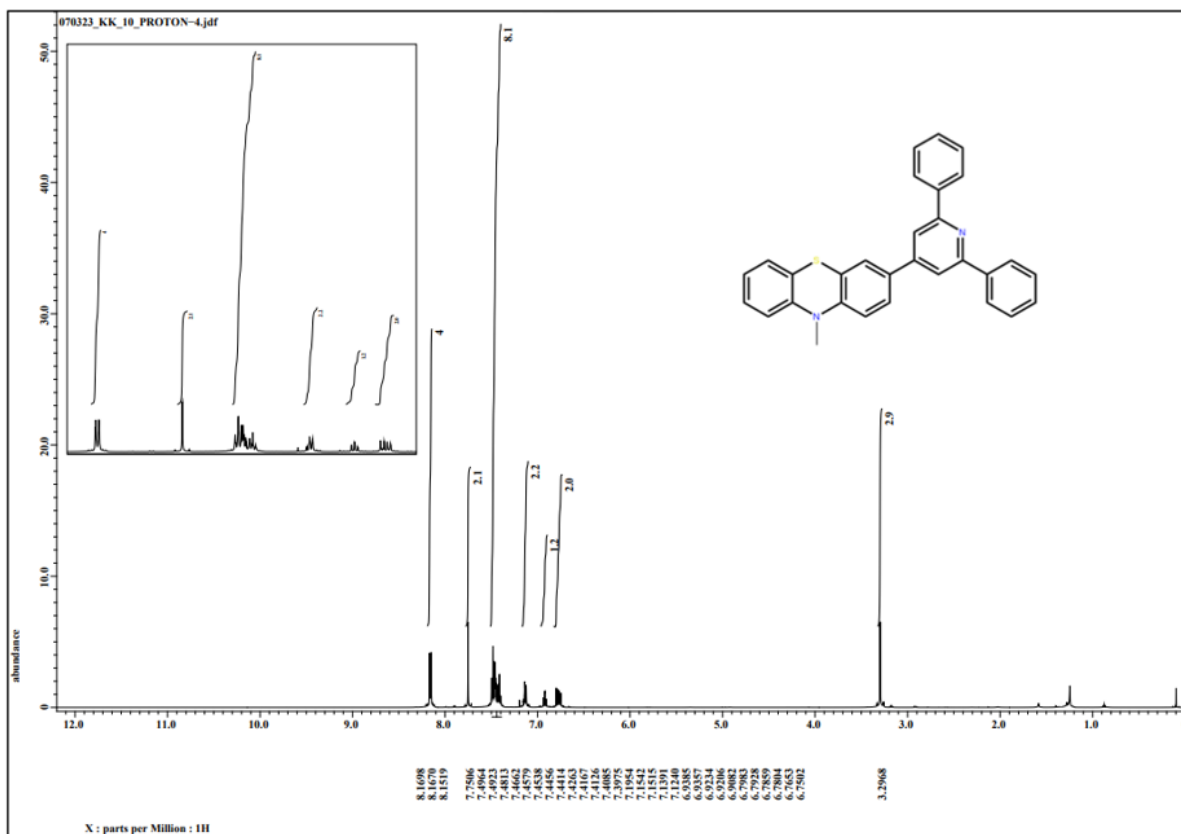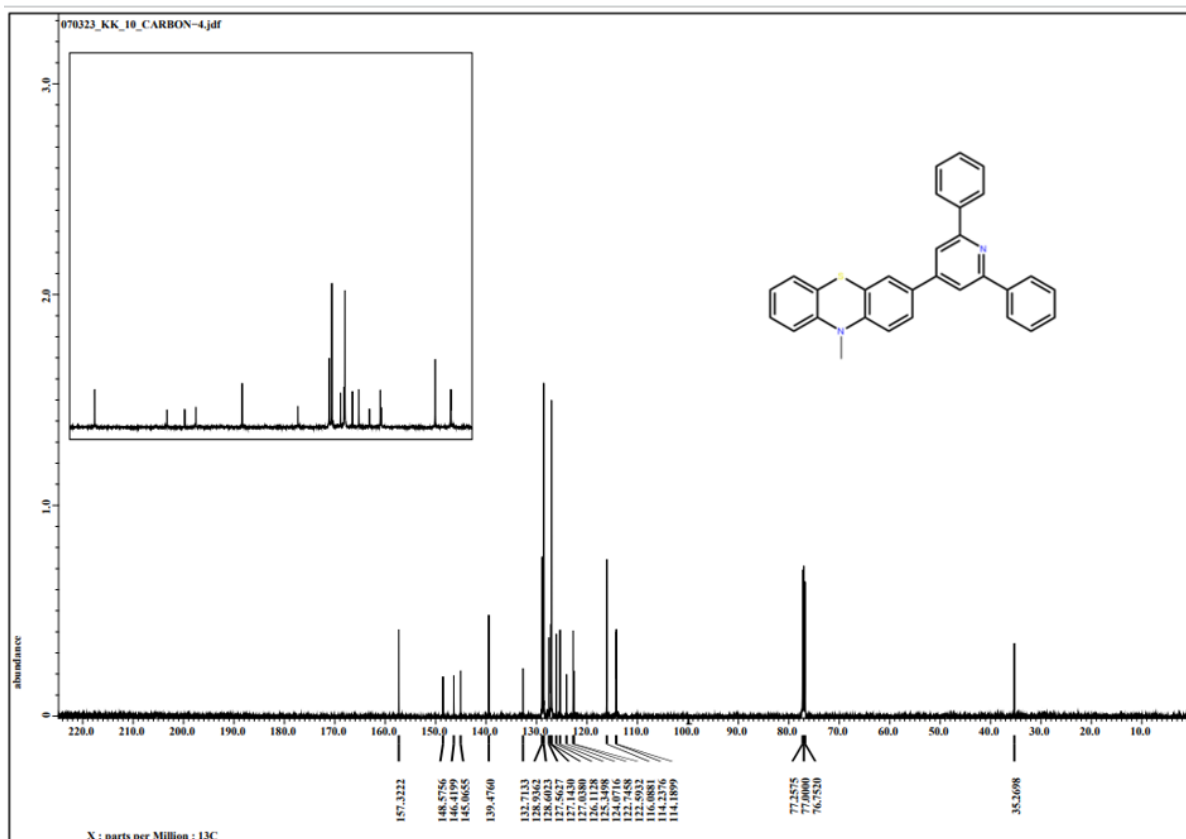

Fig. S4.  $^1\text{H}$  and  $^{13}\text{C}$  NMR spectra of PhMePz

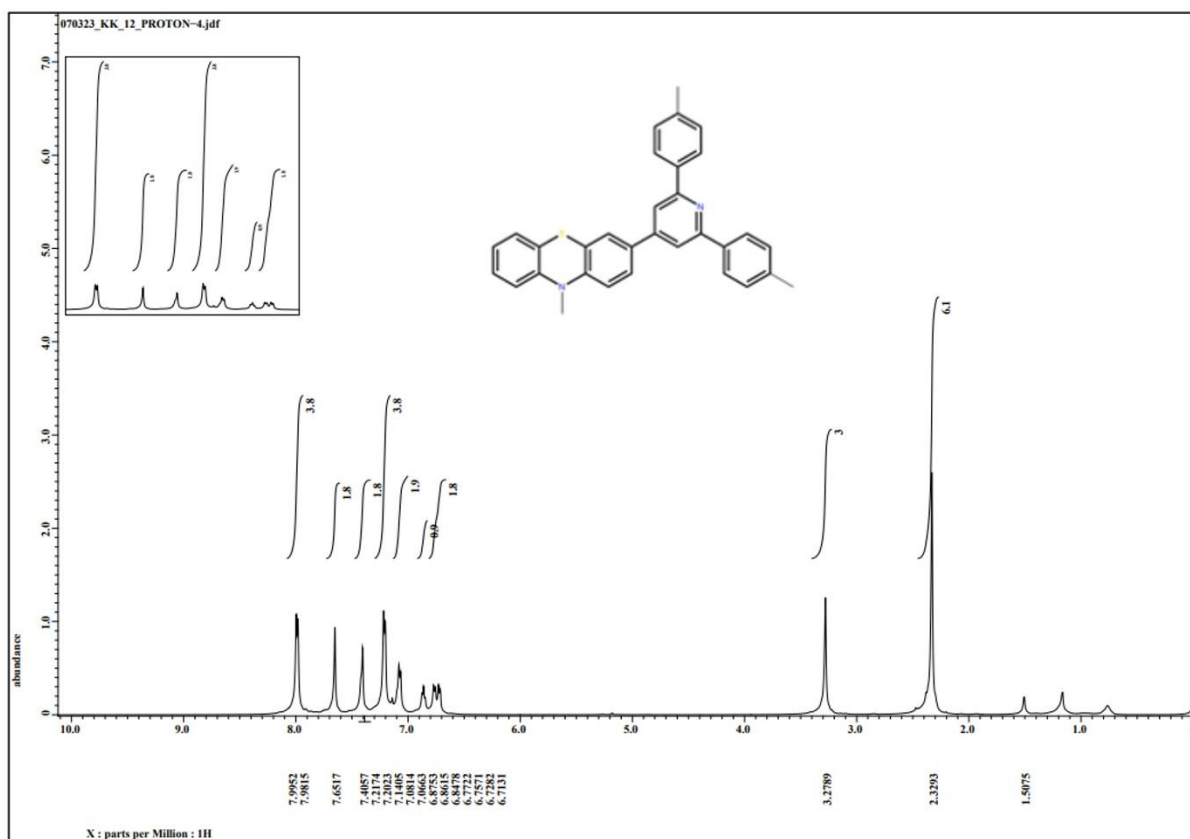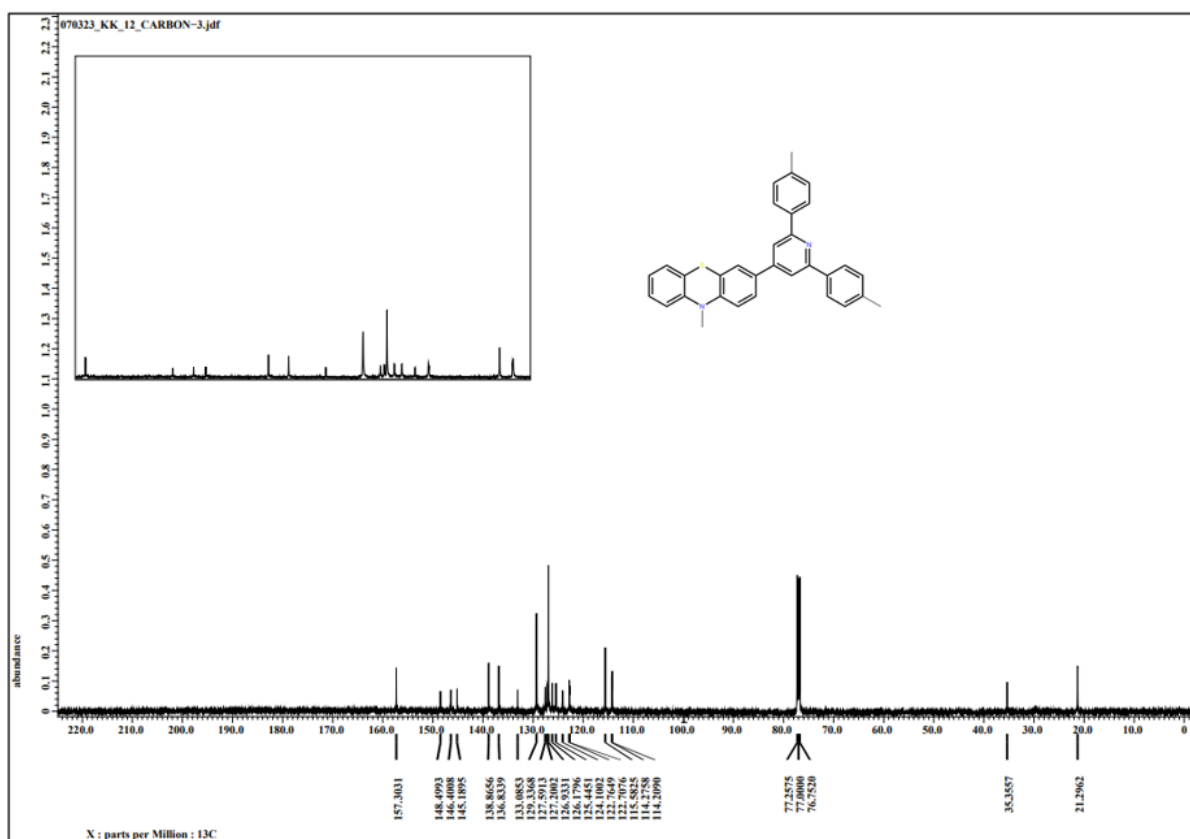

Fig. S5.  $^1\text{H}$  and  $^{13}\text{C}$  NMR spectra of TolMePz

#### 4. HRMS

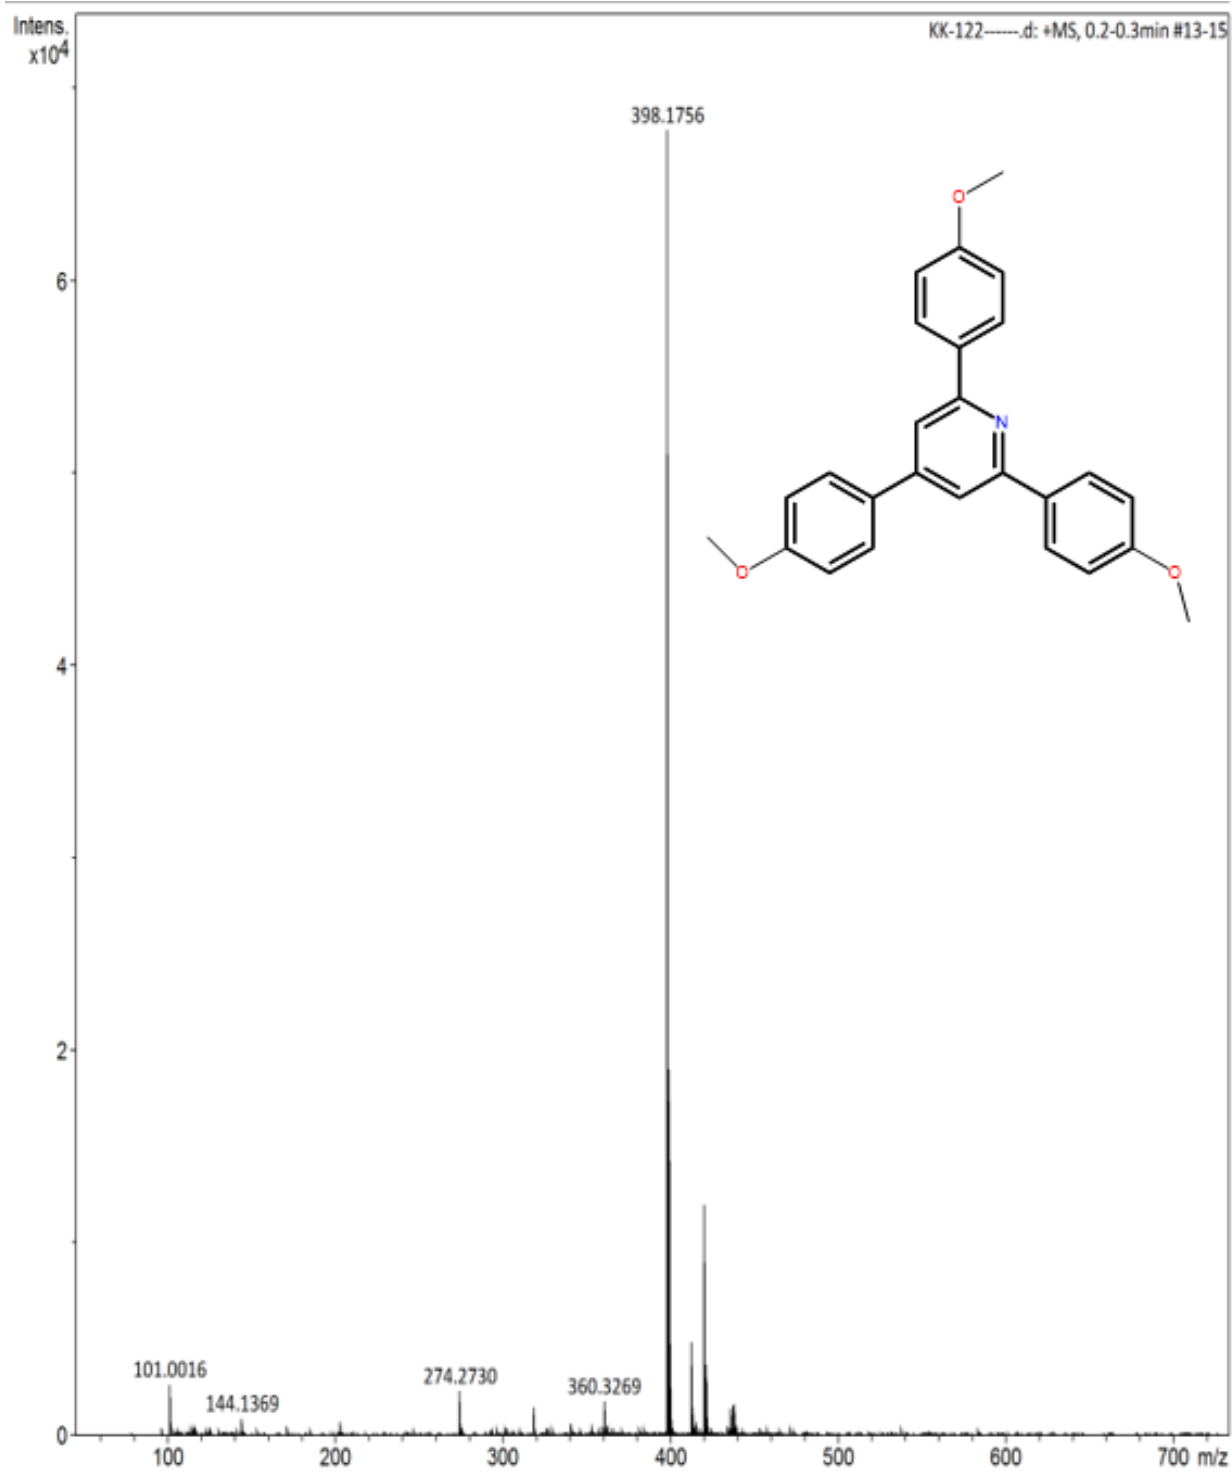

**Fig. S6.** HRMS spectra of **PhMeO**

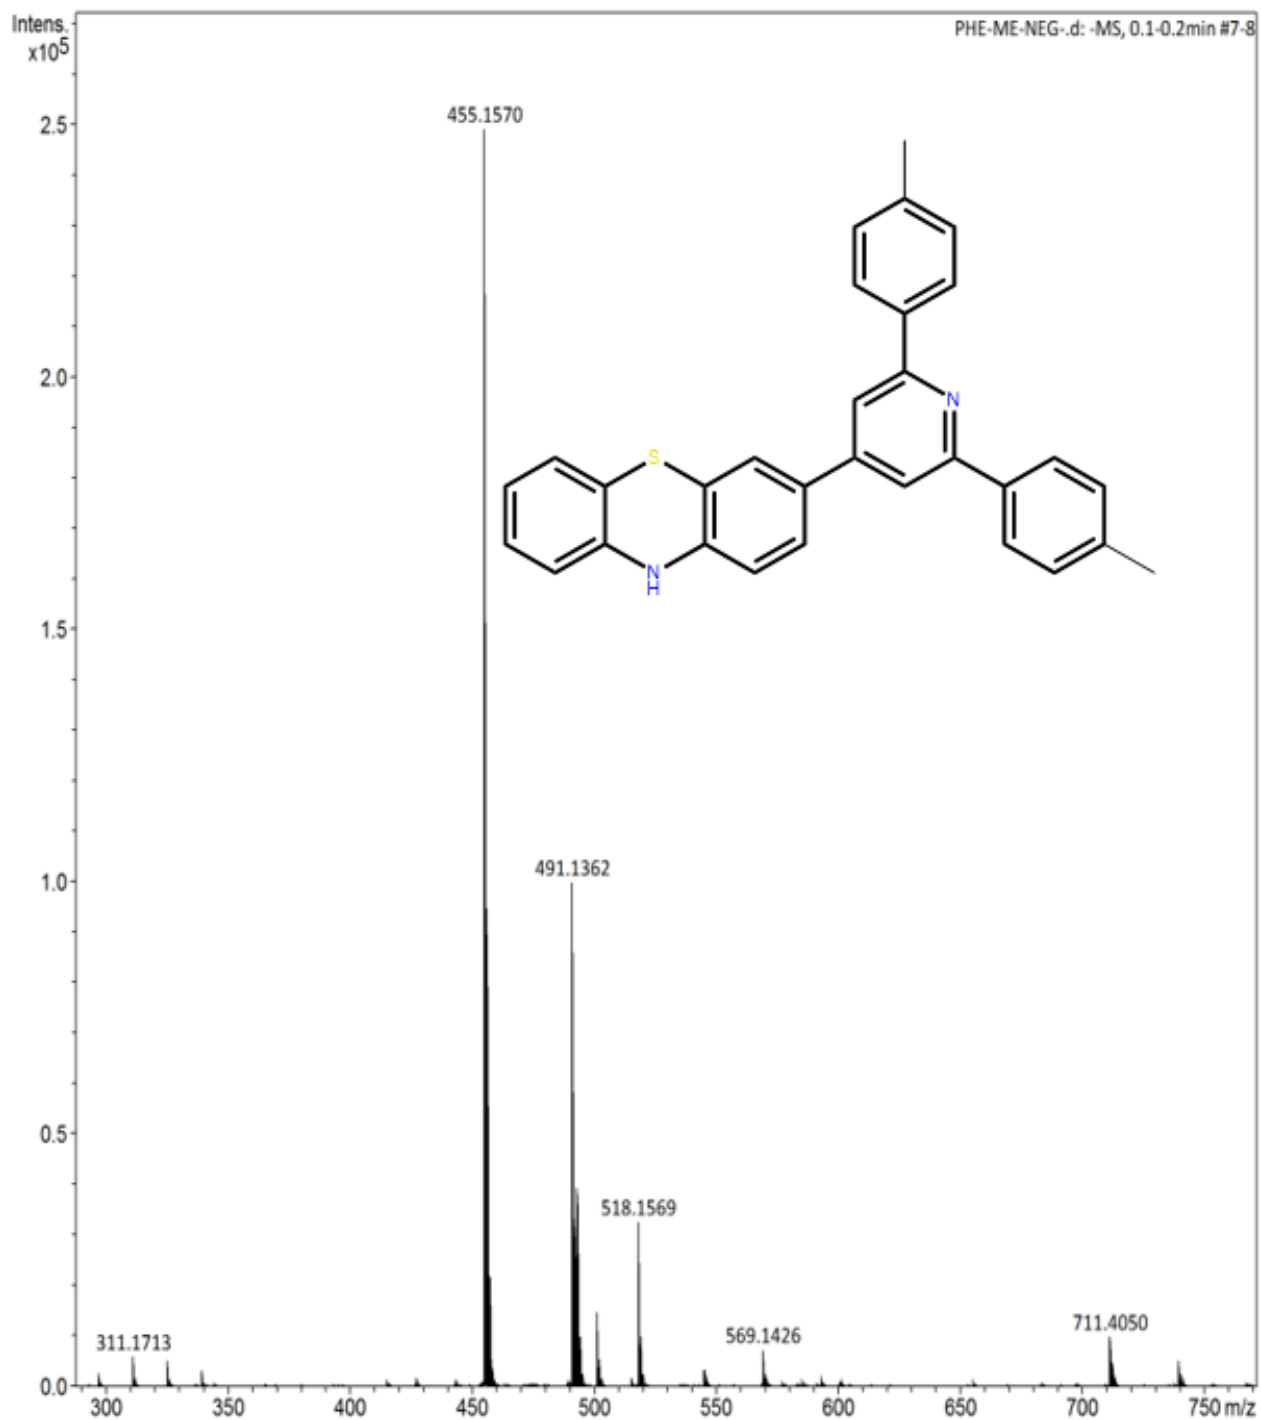

**Fig. S7.** HRMS spectra of TolPz

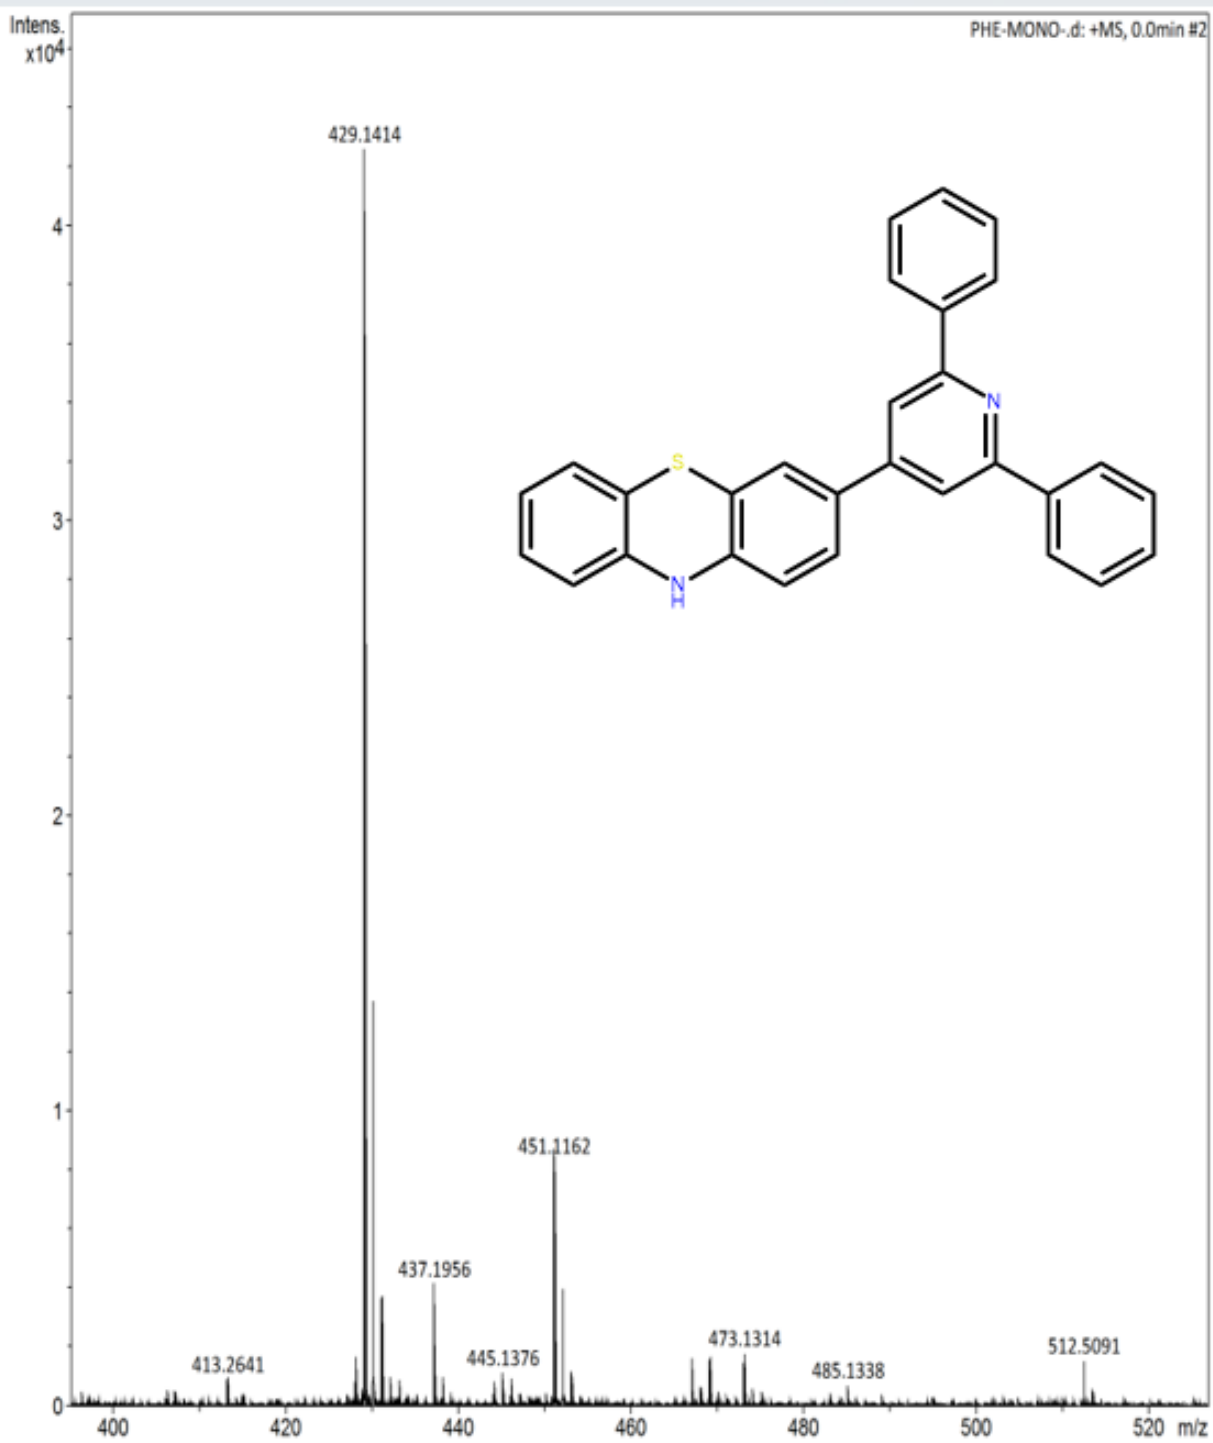

**Fig. S8.** HRMS spectra of **PhPz**

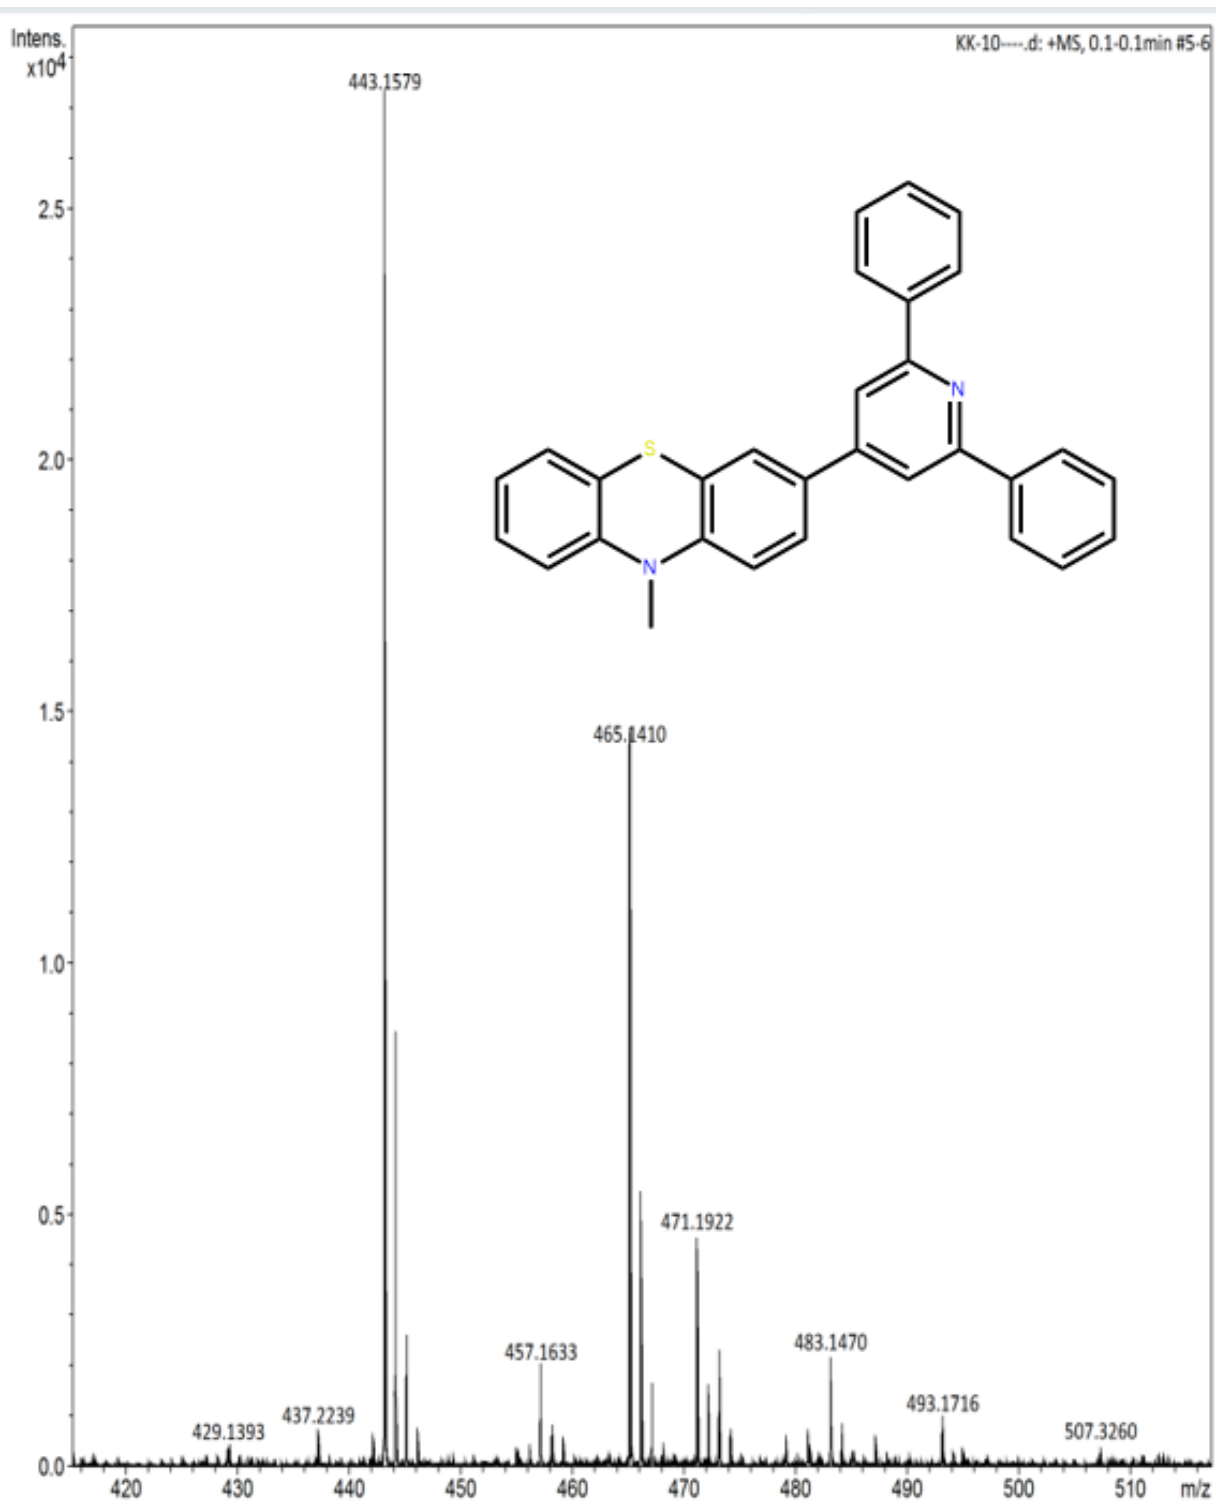

**Fig. S9.** HRMS spectra of **PhMePz**



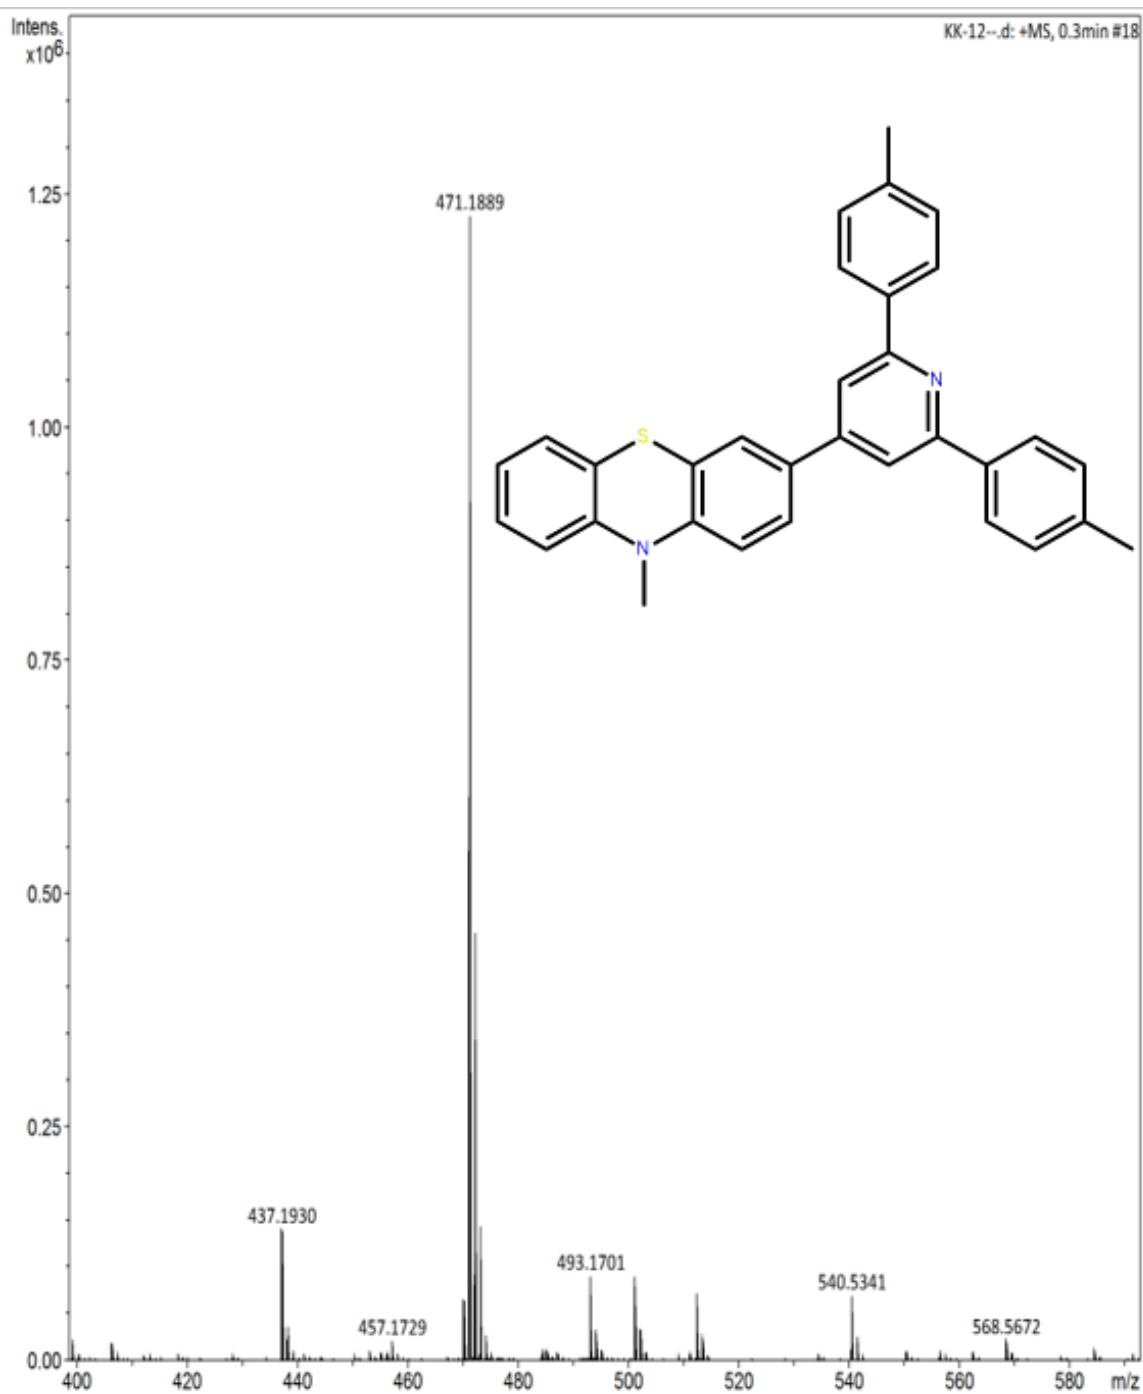

**Fig. S10.** HRMS spectra of TolMePz

## 5.Theoretical and experimental results

**Table S1:** Computed HOMO and LUMO energies (in eV) with three different density functionals.

| Molecule       | HOMO  |       |       |           | LUMO  |       |       |           |
|----------------|-------|-------|-------|-----------|-------|-------|-------|-----------|
|                | Exp.  | B3LYP | PBE0  | CAM-B3LYP | Exp.  | B3LYP | PBE0  | CAM-B3LYP |
| <b>PhMePz</b>  | -5.12 | -5.45 | -5.68 | -6.79     | -1.50 | -1.70 | -1.59 | -0.48     |
| <b>PhMeO</b>   | -5.34 | -5.84 | -6.06 | -7.16     | -1.68 | -1.49 | -1.38 | -0.28     |
| <b>PhPz</b>    | -5.00 | -5.42 | -5.64 | -6.76     | -1.36 | -1.69 | -1.59 | -0.48     |
| <b>TolMePz</b> | -5.13 | -5.45 | -5.67 | -6.79     | -1.51 | -1.65 | -1.53 | -0.43     |
| <b>TolPz</b>   | -5.00 | -5.41 | -5.63 | -6.75     | -1.37 | -1.64 | -1.54 | -0.43     |
| RMSD           |       | 0.37  | 0.60  | 1.69      |       | 0.27  | 0.27  | 1.19      |

**Table S2:** Computed  $\lambda_{max}$ (in nm) with three different density functionals.

| Molecule       | Exp. | B3LYP  | PBE0   | CAM-B3LYP |
|----------------|------|--------|--------|-----------|
| <b>PhMeO</b>   | 280  | 297.72 | 288.17 | 260.19    |
| <b>PhMePh</b>  | 270  | 285.79 | 274.01 | 252.24    |
| <b>PhPz</b>    | 271  | 284.62 | 272.9  | 253.69    |
| <b>TolMePz</b> | 269  | 285.31 | 274.72 | 252.73    |
| <b>TolPz</b>   | 269  | 284.3  | 274.28 | 253.69    |
| RMSD           |      | 14.9   | 5.4    | 20.0      |

**Table S3:** Comparison between gas-phase and solvent corrected HOMO/LUMO energies against experimental values. The optimization in each phase were carried out using B3LYP/6-311G(d,p) model.

|                | HOMO (eV) |             |              | LUMO (eV) |             |              |
|----------------|-----------|-------------|--------------|-----------|-------------|--------------|
|                | Gas-phase | DCM solvent | Experimental | Gas-phase | DCM solvent | Experimental |
| <b>PhMeO</b>   | -5.41     | -5.45       | -5.12        | -1.55     | -1.70       | -1.50        |
| <b>PhMePh</b>  | -5.37     | -5.45       | -5.13        | -1.46     | -1.65       | -1.51        |
| <b>PhPz</b>    | -5.61     | -5.84       | -5.34        | -1.26     | -1.49       | -1.68        |
| <b>TolMePz</b> | -5.35     | -5.41       | -5.00        | -1.47     | -1.64       | -1.37        |
| <b>TolPz</b>   | -5.38     | -5.42       | -5.00        | -1.55     | -1.69       | -1.36        |

## 6.TD-DFT analysis

6.1. Transition energies, oscillator strengths and MO involved of some intense transitions:

**Table S4.** TD-DFT analysis for electronic transitions of **PhMePz**. Transitions with oscillator strengths (*f*) and MOs with coefficients greater than 0.15 and 0.20, respectively, are reported. Here, H and L stand for HOMO and LUMO, respectively.

| S.No. | Transition Energy<br>(eV)/Wavelength (nm) | Nature of transitions   |                               | <i>f</i> |
|-------|-------------------------------------------|-------------------------|-------------------------------|----------|
|       |                                           | MOs involved            | Coefficients                  |          |
| 1.    | 3.2585/ 380.50                            | H→L                     | 0.68770                       | 0.3190   |
| 2.    | 4.0637/ 305.10                            | H-1→L                   | 0.66574                       | 0.2975   |
| 3.    | 4.3383 / 285.79                           | H-2→L<br>H→L+4          | 0.46907<br>0.40603            | 0.9661   |
| 5.    | 4.9059 / 252.73                           | H-5→L<br>H-3→L+1        | 0.25111<br>0.56175            | 0.5176   |
| 6.    | 4.9385 / 251.06                           | H-4→L<br>H-3→L<br>H→L+8 | 0.41683<br>0.30761<br>0.27256 | 0.2461   |

**Table S5.** TD-DFT analysis for electronic transitions of **TolMePz**. Transitions with oscillator strengths (*f*) and MOs with coefficients greater than 0.24 and 0.20, respectively, are reported. Here, H and L stand for HOMO and LUMO, respectively.

| S.No. | Transition Energy<br>(eV)/Wavelength (nm) | Nature of transitions |                    | <i>f</i> |
|-------|-------------------------------------------|-----------------------|--------------------|----------|
|       |                                           | MOs involved          | Coefficients       |          |
| 1.    | 3.2913 / 376.70                           | H→L                   | 0.68594            | 0.3299   |
| 2.    | 3.9517 / 313.75                           | H-1→L                 | 0.65970            | 0.3411   |
| 3.    | 4.3457 / 285.31                           | H-2→L<br>H→L+4        | 0.41403<br>0.35836 | 1.1506   |
| 4.    | 4.6191 / 268.41                           | H-3→L+1               | 0.62013            | 0.2453   |
| 5.    | 4.6937 / 264.15                           | H-3→L+1               | 0.57764            | 0.4499   |

**Table S6.** TD-DFT analysis for electronic transitions of **PhMeO**. Transitions with oscillator strengths (f) and MOs with coefficients greater than 0.21 and 0.20, respectively, are reported. Here, H and L stand for HOMO and LUMO, respectively.

| S.No. | Transition<br>(eV)/Wavelength (nm) | Energy | Nature of transitions                           | f      |
|-------|------------------------------------|--------|-------------------------------------------------|--------|
|       |                                    |        | MOs involved Coefficients                       |        |
| 1.    | 3.7573 / 329.98                    |        | H→L 0.68064                                     | 0.3097 |
| 2.    | 4.1645 / 297.72                    |        | H-2→L 0.28713<br>H-1→L 0.41813<br>H→L+1 0.47997 | 1.2231 |
| 3.    | 4.3151 / 287.33                    |        | H-1→L+1 0.66452                                 | 0.5455 |
| 4.    | 4.4433 / 279.04                    |        | H-2→L+1 0.68590                                 | 0.2113 |
| 5.    | 5.0604 / 245.01                    |        | H→L+5 0.66441                                   | 0.2553 |
| 6.    | 5.4141 / 229.00                    |        | H-1 →L+5 0.65587                                | 0.3034 |

**Table S7.** TD-DFT analysis for electronic transitions of **TolPz**. Transitions with oscillator strengths (f) and MOs with coefficients greater than 0.24 and 0.20, respectively, are reported. Here, H and L stand for HOMO and LUMO, respectively.

| S.No. | Transition Energy<br>(eV)/Wavelength (nm) | Nature of transitions |                    | f      |
|-------|-------------------------------------------|-----------------------|--------------------|--------|
|       |                                           | MOs involved          | Coefficients       |        |
| 1.    | 3.2689 / 379.29                           | H→L                   | 0.68527            | 0.3935 |
| 2.    | 3.9554 / 313.46                           | H-1→L                 | 0.66941            | 0.3422 |
| 3.    | 4.0857 / 303.46                           | H→L+3                 | 0.65855            | 0.3422 |
| 4.    | 4.3610 / 284.30                           | H-2→L<br>H-1→L        | 0.45707<br>0.41607 | 1.2112 |
| 5.    | 4.6455 / 266.89                           | H-3→L+1<br>H -2→L+1   | 0.27729<br>0.59247 | 0.3183 |
| 6.    | 4.6977 / 263.92                           | H-1→L+1               | 0.50033            | 0.2773 |

**Table S8.** TD-DFT analysis for electronic transitions of **PhPz**. Transitions with oscillator strengths (*f*) and MOs with coefficients greater than 0.11 and 0.20, respectively, are reported. Here, H and L stand for HOMO and LUMO, respectively.

| S.No. | Transition<br>(eV)/Wavelength (nm) | Energy | Nature of transitions |                    | <i>f</i> |
|-------|------------------------------------|--------|-----------------------|--------------------|----------|
|       |                                    |        | MOs involved          | Coefficients       |          |
| 1.    | 3.2383 / 382.87                    |        | H→L                   | 0.68728            | 0.3829   |
| 2.    | 4.0823 / 303.71                    |        | H→L+3                 | 0.56303            | 0.2529   |
| 3.    | 4.3561 / 284.62                    |        | H-2→L                 | 0.54626            | 1.0230   |
| 4.    | 4.9133 / 252.35                    |        | H-4→L<br>H-3→L+1      | 0.25215<br>0.57304 | 0.5093   |
| 5.    | 5.0291 / 246.53                    |        | H-5→L                 | 0.25830            | 0.1627   |
| 6.    | 5.0417 / 245.92                    |        | H-2→L+2               | 0.53671            | 0.1755   |



## 6.2. Calculated UV-visible spectrum

The plots were obtained using GaussView software, where the molar absorptivity of the electronic transitions (in  $\text{Lmol}^{-1}\text{cm}^{-1}$ ) is plotted with a Gaussian band shape to match the conventional UV-vis spectrum of experiments. The left-axis of the spectra presented below is the molar absorptivity, and the right-axes are the oscillator strength. The relation between the oscillator strength ( $f$ ) value and molar absorptivity with a Gaussian fitting is given by<sup>5</sup>

$$\varepsilon_i(\tilde{\nu}) = \frac{\sqrt{\pi}e^2N}{1000\ln(10)c^2m_e\sigma} f_i \exp\left[-\left(\frac{\tilde{\nu}-\tilde{\nu}_i}{\sigma}\right)^2\right]$$

Here,  $N$ ,  $c$ ,  $e$ ,  $m_e$ , are Avogadro's number, speed of light, charge of an electron and mass of an electron, respectively.  $\tilde{\nu}$  and  $\tilde{\nu}_i$  are the energy of incident radiation and excitation energy in wavenumbers, respectively.  $\sigma$  is the standard deviation in wavenumber unit. As default, the GaussView uses  $\sigma$  value equal to 0.4 eV.

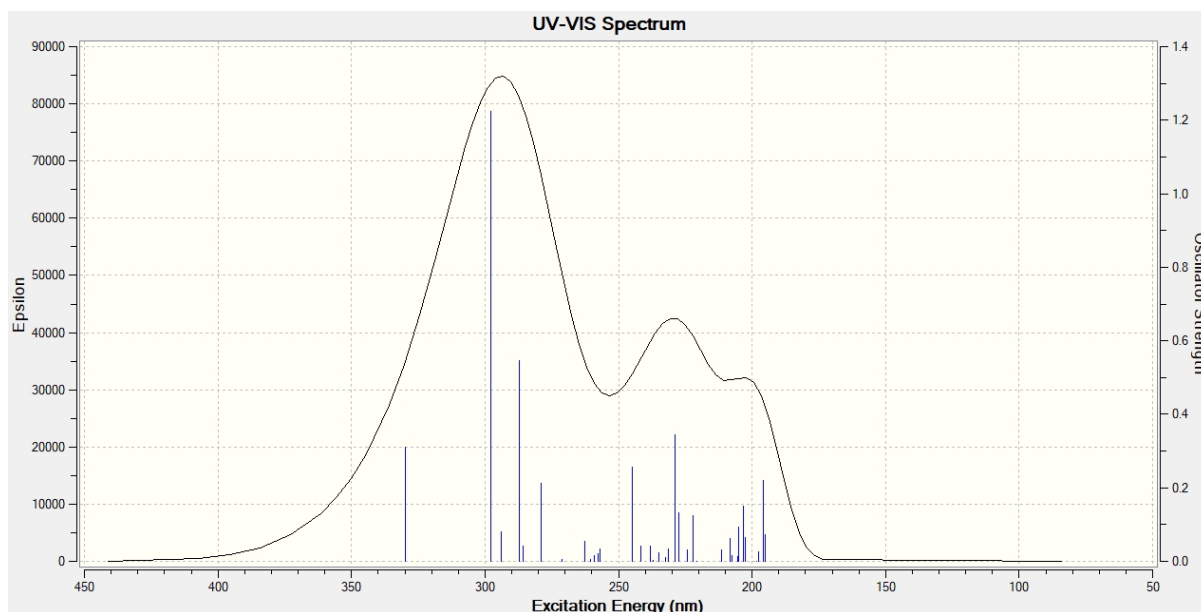

**Fig. S11.** Computed UV-vis spectrum of **PhMeO** with TD-DFT. The left-axis is the molar absorptivity fitted with a Gaussian band width of HWFM value 0.4 eV

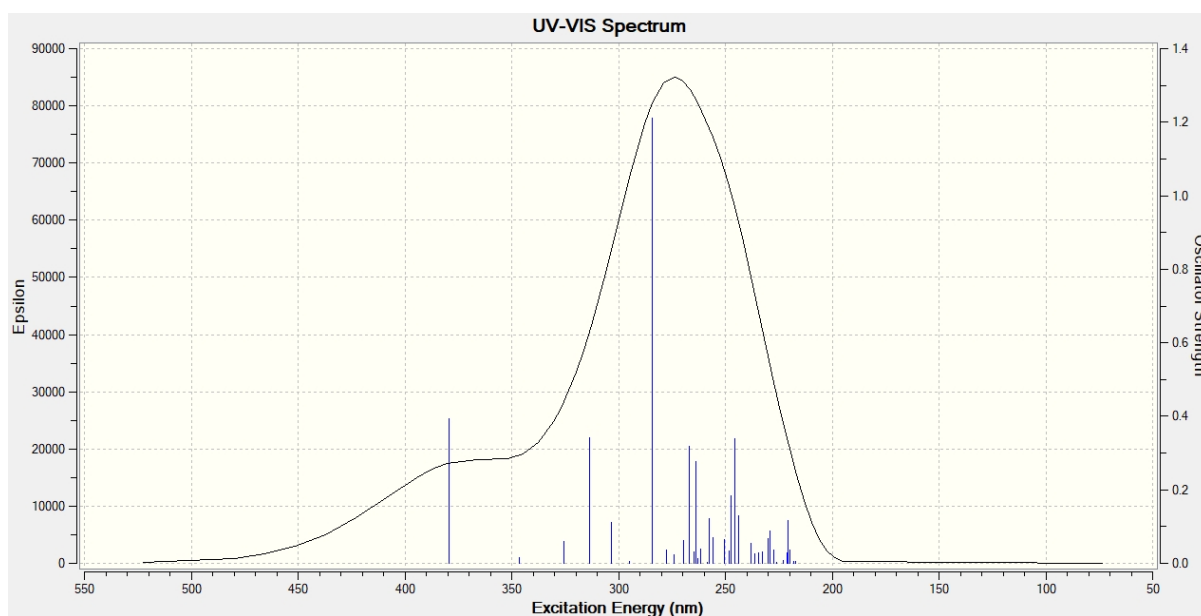

**Fig. S12.** Computed UV-vis spectrum of **TolPz** with TD-DFT. The left-axis is the molar absorptivity fitted with a Gaussian band width of HWFM value 0.4 eV.

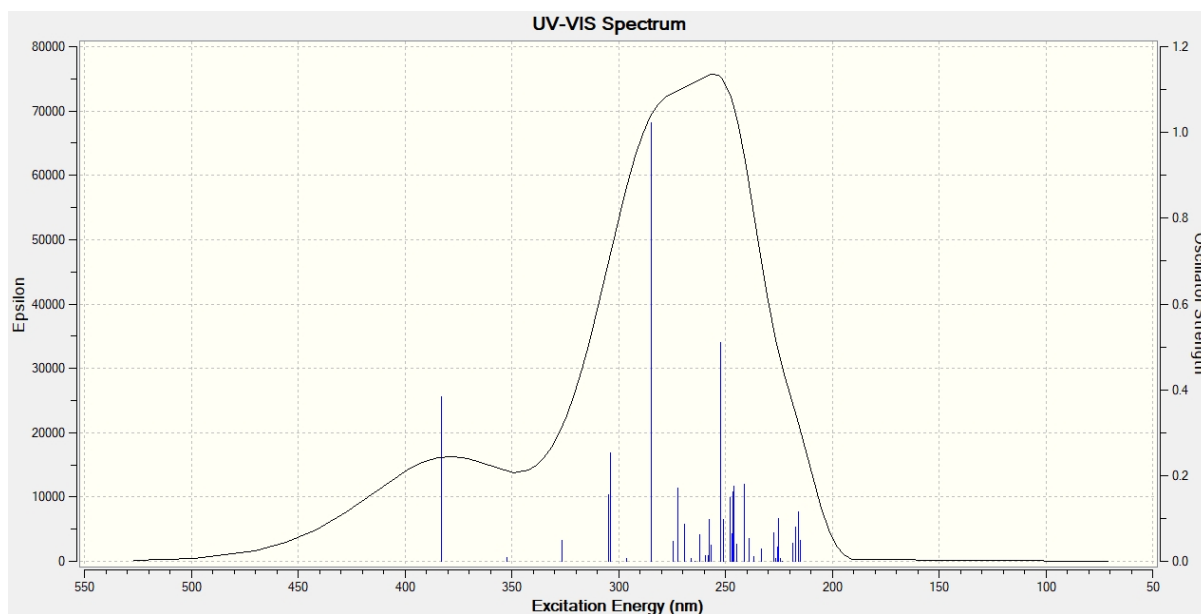

**Fig. S13.** Computed UV-vis spectrum of **PhPz** with TD-DFT. The left-axis is the molar absorptivity fitted with a Gaussian band width of HWFM value 0.4 eV.

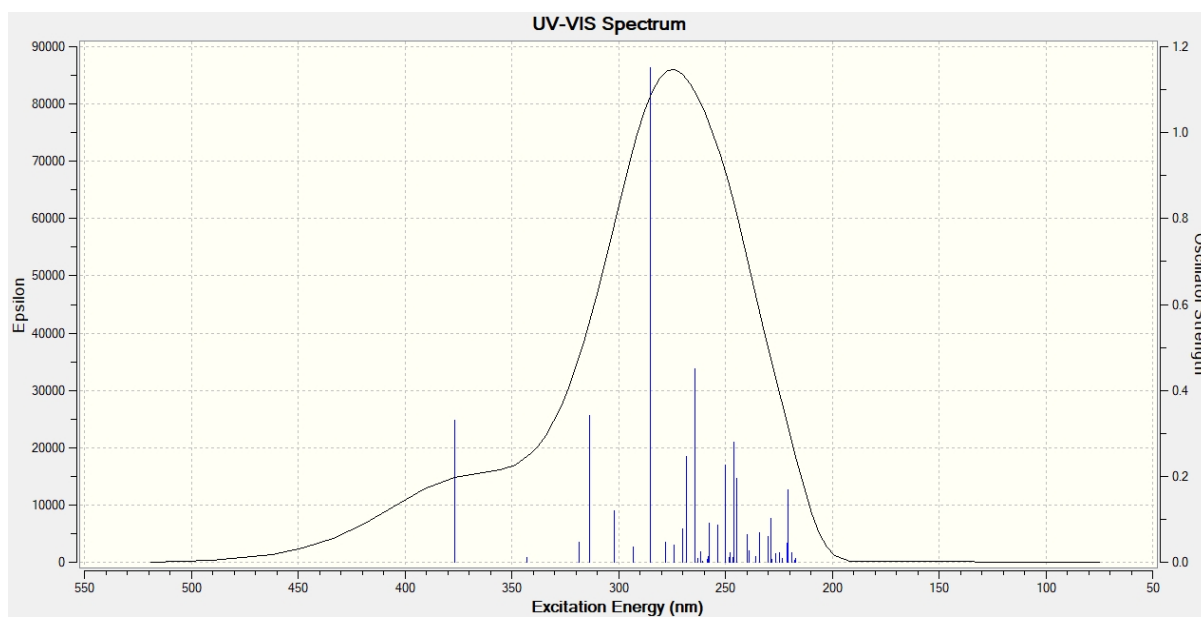

**Fig. S14.** Computed UV-vis spectrum of **TolMePz** with TD-DFT. The left-axis is the molar absorptivity fitted with a Gaussian band width of HWFM value 0.4 eV.

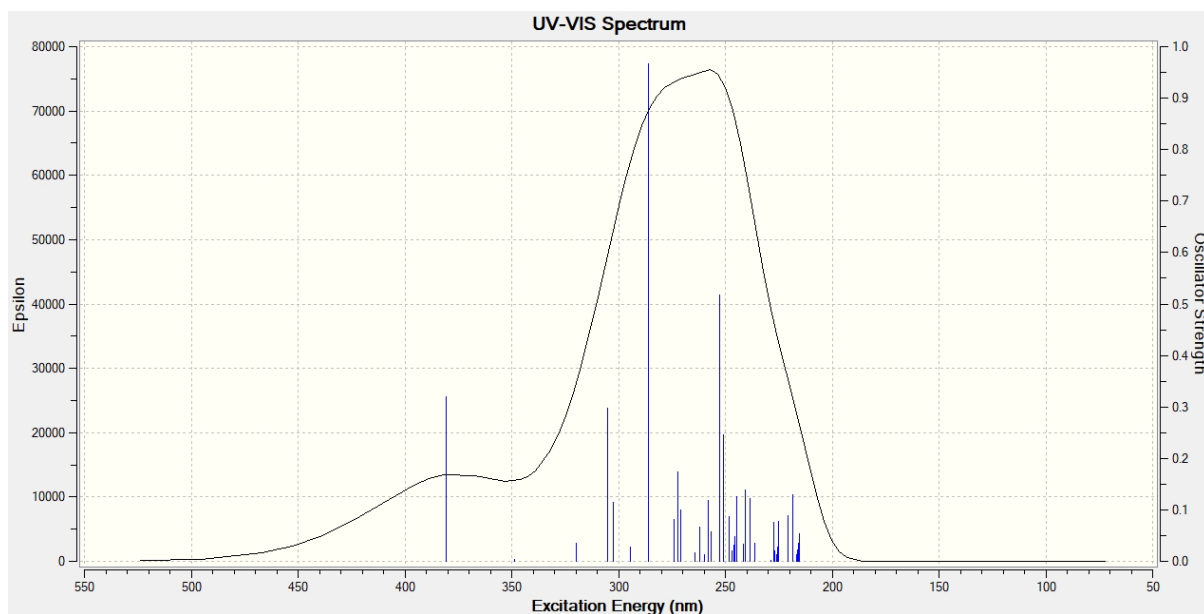

**Fig. S15.** Computed UV-vis spectrum of **PhMePz** with TD-DFT. The left-axis is the molar absorptivity fitted with a Gaussian band width of HWHM value 0.4 eV.

**Table S9:** Charge transfer distances and magnitude of charge transfer for each molecule: computed with CAM-B3LYP method and 6-311G(d,p) basis set.

| Molecule       | S <sub>1</sub>      |                 | S <sub>2</sub>      |                 | T <sub>1</sub>      |                 | T <sub>2</sub>      |                 |
|----------------|---------------------|-----------------|---------------------|-----------------|---------------------|-----------------|---------------------|-----------------|
|                | D <sub>CT</sub> (Å) | Q <sub>CT</sub> |
| <b>PhMeO</b>   | 1.64                | 0.55            | 0.30                | 0.46            | 0.50                | 0.33            | 1.04                | 0.44            |
| <b>PhMePh</b>  | 2.27                | 0.68            | 2.39                | 0.62            | 1.83                | 0.45            | 0.11                | 0.32            |
| <b>PhPz</b>    | 2.01                | 0.64            | 2.55                | 0.62            | 1.62                | 0.46            | 0.33                | 0.31            |
| <b>TolMePz</b> | 2.16                | 0.68            | 2.16                | 0.58            | 1.69                | 0.42            | 0.11                | 0.34            |
| <b>TolPz</b>   | 1.88                | 0.64            | 2.52                | 0.62            | 1.53                | 0.45            | 0.34                | 0.32            |

## 7. Cartesian coordinates

### Cartesian coordinates of the optimized structures of PhMePz

| atomic number | X-coordinate | Y-coordinate | Z-coordinate |
|---------------|--------------|--------------|--------------|
| 6             | 7.391575278  | 1.622462748  | 0.248855138  |
| 6             | 7.645239674  | 0.433893003  | 0.925551662  |
| 6             | 6.726109963  | -0.613809170 | 0.888386369  |
| 6             | 5.545583891  | -0.504993260 | 0.140610304  |
| 6             | 5.303904196  | 0.699499678  | -0.544983800 |
| 6             | 6.206873362  | 1.756364743  | -0.473961518 |
| 7             | 4.611127541  | -1.563627514 | 0.061723700  |
| 6             | 3.235328935  | -1.270485882 | 0.084365613  |
| 6             | 2.740744961  | -0.141546162 | -0.597111580 |
| 16            | 3.863816201  | 0.823934851  | -1.592404078 |
| 6             | 5.041801958  | -2.895499307 | 0.476003506  |
| 6             | 2.310404644  | -2.075919723 | 0.764251557  |
| 6             | 0.951481379  | -1.781424932 | 0.742102960  |
| 6             | 0.460767138  | -0.652051762 | 0.076965837  |
| 6             | 1.388563589  | 0.171838095  | -0.578220862 |
| 6             | -0.985248100 | -0.327520236 | 0.068775935  |
| 6             | -1.955747739 | -1.333899663 | 0.026204216  |

|   |              |              |              |
|---|--------------|--------------|--------------|
| 6 | -3.312092249 | -0.991768119 | 0.006478785  |
| 7 | -3.722210936 | 0.284597208  | 0.054768517  |
| 6 | -2.807859511 | 1.264667748  | 0.110380217  |
| 6 | -1.434866524 | 0.996490846  | 0.104234074  |
| 6 | -3.327612198 | 2.659578384  | 0.161074173  |
| 6 | -4.375965738 | -2.032631198 | -0.050718609 |
| 6 | -4.589144084 | 2.954545354  | -0.376430400 |
| 6 | -5.089949119 | 4.252107162  | -0.345859671 |
| 6 | -4.344065642 | 5.280243120  | 0.230715990  |
| 6 | -3.093206145 | 4.998185032  | 0.777195418  |
| 6 | -2.588729895 | 3.700553828  | 0.741907588  |
| 6 | -4.144078288 | -3.292346720 | -0.621997600 |
| 6 | -5.152005856 | -4.252539701 | -0.661987710 |
| 6 | -6.409731450 | -3.972627098 | -0.130353447 |
| 6 | -6.653730687 | -2.721252441 | 0.435659849  |
| 6 | -5.648993380 | -1.759630936 | 0.471093539  |
| 1 | 8.100246116  | 2.441008632  | 0.283968341  |
| 1 | 8.556100566  | 0.316861224  | 1.501139444  |
| 1 | 6.933192103  | -1.516609020 | 1.446555001  |
| 1 | 5.987408105  | 2.677696434  | -1.001059736 |

|   |              |              |              |
|---|--------------|--------------|--------------|
| 1 | 5.061170772  | -3.028014635 | 1.565245146  |
| 1 | 4.368306919  | -3.635877948 | 0.045812537  |
| 1 | 6.041185478  | -3.081225821 | 0.084326434  |
| 1 | 2.648618038  | -2.936258597 | 1.325239106  |
| 1 | 0.272245354  | -2.424731193 | 1.288523894  |
| 1 | 1.049282580  | 1.046188893  | -1.120975905 |
| 1 | -1.656716396 | -2.372878241 | -0.000243776 |
| 1 | -0.722829806 | 1.809831071  | 0.135633135  |
| 1 | -5.165562504 | 2.153224412  | -0.820279294 |
| 1 | -6.063712289 | 4.462304599  | -0.774082189 |
| 1 | -4.735526788 | 6.290857390  | 0.256848979  |
| 1 | -2.510685633 | 5.787440066  | 1.238879512  |
| 1 | -1.624346174 | 3.497991963  | 1.192478234  |
| 1 | -3.180638816 | -3.521250425 | -1.061835606 |
| 1 | -4.955758584 | -5.217277356 | -1.116093493 |
| 1 | -7.193546357 | -4.720958972 | -0.160320424 |
| 1 | -7.629047326 | -2.494633713 | 0.851800716  |
| 1 | -5.834974682 | -0.786334770 | 0.906334516  |

**Cartesian coordinates of the optimized structures of TolMePz**

| <b>atomic number</b> | <b>X-coordinate</b> | <b>Y-coordinate</b> | <b>Z-coordinate</b> |
|----------------------|---------------------|---------------------|---------------------|
| 6                    | 7.820894770         | 1.458338720         | 0.231088479         |
| 6                    | 8.057511667         | 0.274730915         | 0.922506242         |
| 6                    | 7.124223978         | -0.760747102        | 0.896828450         |
| 6                    | 5.946151065         | -0.645000967        | 0.146206884         |
| 6                    | 5.721836957         | 0.554242841         | -0.554461274        |
| 6                    | 6.639044801         | 1.599494418         | -0.495029554        |
| 7                    | 4.997354684         | -1.691456507        | 0.078836198         |
| 6                    | 3.625503846         | -1.378763734        | 0.096731758         |
| 6                    | 3.147369278         | -0.251783346        | -0.599372214        |
| 16                   | 4.284997819         | 0.685102141         | -1.605558943        |
| 6                    | 5.409064945         | -3.023869966        | 0.510168419         |
| 6                    | 2.688893496         | -2.162106287        | 0.786194278         |
| 6                    | 1.334290826         | -1.848254965        | 0.759666882         |
| 6                    | 0.859889243         | -0.720560932        | 0.080007019         |
| 6                    | 1.799780032         | 0.081198197         | -0.585280018        |
| 6                    | -0.581518795        | -0.374934340        | 0.067408368         |
| 6                    | -1.566151351        | -1.367703802        | 0.036808509         |



|   |              |              |              |
|---|--------------|--------------|--------------|
| 6 | -2.917947858 | -1.006374888 | 0.012593927  |
| 7 | -3.308539343 | 0.277019626  | 0.046010573  |
| 6 | -2.380138400 | 1.245057471  | 0.090159932  |
| 6 | -1.010951377 | 0.956005670  | 0.086825929  |
| 6 | -2.879117995 | 2.646567238  | 0.125286979  |
| 6 | -3.995865546 | -2.031335322 | -0.032515475 |
| 6 | -4.142020752 | 2.956977146  | -0.398602680 |
| 6 | -4.620799414 | 4.261700092  | -0.383981473 |
| 6 | -3.866611686 | 5.306831869  | 0.163199799  |
| 6 | -2.609491249 | 4.994537535  | 0.691523627  |
| 6 | -2.122273872 | 3.691147257  | 0.673802497  |
| 6 | -3.785408712 | -3.306827756 | -0.572513580 |
| 6 | -4.810055418 | -4.249117961 | -0.602355742 |
| 6 | -6.078900417 | -3.957519596 | -0.092699264 |
| 6 | -6.289249961 | -2.678714666 | 0.439411581  |
| 6 | -5.272474422 | -1.732694142 | 0.466552015  |
| 6 | -4.404235990 | 6.715939812  | 0.208424732  |
| 6 | -7.182098612 | -4.986807266 | -0.097745072 |
| 1 | 8.540618321  | 2.267526549  | 0.257215815  |
| 1 | 8.965990362  | 0.152368933  | 1.500754055  |

|   |              |              |              |
|---|--------------|--------------|--------------|
| 1 | 7.318203001  | -1.659362981 | 1.466325259  |
| 1 | 6.432877080  | 2.517176622  | -1.033740951 |
| 1 | 5.425530930  | -3.143157482 | 1.601016279  |
| 1 | 4.725750841  | -3.760099085 | 0.088409201  |
| 1 | 6.406202525  | -3.228283384 | 0.122054474  |
| 1 | 3.014499120  | -3.020126698 | 1.358141072  |
| 1 | 0.645588751  | -2.474660749 | 1.313805099  |
| 1 | 1.473214401  | 0.953444145  | -1.139076090 |
| 1 | -1.282011077 | -2.411118034 | 0.023129420  |
| 1 | -0.286625246 | 1.758788904  | 0.108266132  |
| 1 | -4.738616135 | 2.160978970  | -0.825386490 |
| 1 | -5.596753161 | 4.474367232  | -0.808829444 |
| 1 | -2.003057477 | 5.781353734  | 1.128538477  |
| 1 | -1.151722431 | 3.489830118  | 1.111980648  |
| 1 | -2.824305483 | -3.565671177 | -1.001165133 |
| 1 | -4.620926136 | -5.224672704 | -1.038464667 |
| 1 | -7.265556638 | -2.421398535 | 0.838238041  |
| 1 | -5.453244154 | -0.747728167 | 0.877434274  |
| 1 | -4.977986479 | 6.885715696  | 1.126267191  |
| 1 | -3.597258259 | 7.451617052  | 0.187535199  |

|   |              |              |              |
|---|--------------|--------------|--------------|
| 1 | -5.071605877 | 6.914284441  | -0.633258291 |
| 1 | -7.303532831 | -5.434820742 | 0.894504780  |
| 1 | -8.141818016 | -4.539815191 | -0.369307222 |
| 1 | -6.969986749 | -5.795026510 | -0.800411218 |

**Cartesian coordinates of the optimized structures of PhMeO**

**atomic number X-coordinate Y-coordinate Z-coordinate**

|   |              |              |              |
|---|--------------|--------------|--------------|
| 6 | 0.730892975  | -1.315388260 | -0.030113467 |
| 6 | -0.657408840 | -1.133349434 | -0.027985057 |
| 7 | -1.210300183 | 0.089803600  | -0.003675414 |
| 6 | -0.414962692 | 1.171588841  | -0.003144076 |
| 6 | 0.980104974  | 1.061125439  | -0.047241392 |
| 6 | 1.579070965  | -0.203136699 | -0.050035159 |
| 6 | 3.052715285  | -0.358913026 | -0.073115771 |
| 6 | -1.088938424 | 2.496131460  | 0.008912263  |
| 6 | -1.591432503 | -2.289237448 | -0.018013703 |
| 6 | -1.219313918 | -3.552355194 | -0.510444110 |
| 6 | -2.101802433 | -4.619922255 | -0.492497233 |
| 6 | -3.394782978 | -4.460957261 | 0.024659440  |
| 6 | -3.786316695 | -3.210452439 | 0.514807934  |
| 6 | -2.889338498 | -2.145722467 | 0.484458279  |

|   |              |              |              |
|---|--------------|--------------|--------------|
| 6 | 3.889316136  | 0.540416646  | 0.597618426  |
| 6 | 5.275747526  | 0.401817417  | 0.586687952  |
| 6 | 5.860844994  | -0.657116565 | -0.114892268 |
| 6 | 5.038317199  | -1.566251381 | -0.794983849 |
| 6 | 3.661854413  | -1.418189053 | -0.769709915 |
| 6 | -2.406980296 | 2.622991651  | -0.443483851 |
| 6 | -3.064347903 | 3.850479749  | -0.453674019 |
| 6 | -2.403681088 | 4.994784380  | 0.005881857  |
| 6 | -1.086507394 | 4.884425671  | 0.472246893  |
| 6 | -0.444551844 | 3.656943071  | 0.471260171  |
| 8 | 7.198174223  | -0.887788457 | -0.196295783 |
| 6 | 8.087974231  | 0.010875669  | 0.467302663  |
| 8 | -2.946344578 | 6.241801918  | 0.043155161  |
| 6 | -4.288784511 | 6.415506149  | -0.411078123 |
| 8 | -4.184726457 | -5.568330469 | 0.003036861  |
| 6 | -5.515490110 | -5.467710008 | 0.510585883  |
| 1 | 1.148420482  | -2.311738800 | 0.021792551  |
| 1 | 1.594085496  | 1.948648752  | -0.117978912 |
| 1 | -0.234635263 | -3.702939306 | -0.936645810 |
| 1 | -1.814721759 | -5.588946897 | -0.882991492 |

|   |              |              |              |
|---|--------------|--------------|--------------|
| 1 | -4.776461955 | -3.056070983 | 0.921801034  |
| 1 | -3.194587319 | -1.179158076 | 0.863742675  |
| 1 | 3.456162475  | 1.356042895  | 1.164935860  |
| 1 | 5.881605940  | 1.113889941  | 1.130134021  |
| 1 | 5.503296014  | -2.376488309 | -1.343737529 |
| 1 | 3.049433804  | -2.122395053 | -1.320722631 |
| 1 | -2.920741252 | 1.739258469  | -0.799086841 |
| 1 | -4.079973412 | 3.903304624  | -0.821756138 |
| 1 | -0.589616123 | 5.774641279  | 0.839021535  |
| 1 | 0.565681891  | 3.602285163  | 0.858919446  |
| 1 | 7.914202424  | 0.016542062  | 1.547589543  |
| 1 | 9.089706764  | -0.362098389 | 0.264216197  |
| 1 | 7.991411766  | 1.027491256  | 0.074243831  |
| 1 | -4.990289993 | 5.826637865  | 0.187658304  |
| 1 | -4.507796919 | 7.474172227  | -0.287424868 |
| 1 | -4.389763416 | 6.144254654  | -1.466404752 |
| 1 | -5.517236236 | -5.194302586 | 1.570128240  |
| 1 | -6.103757989 | -4.740193221 | -0.056965225 |
| 1 | -5.952340534 | -6.457234739 | 0.392030355  |

### Cartesian coordinates of the optimized structures of TolPz

| atomic number | X-coordinate | Y-coordinate | Z-coordinate |
|---------------|--------------|--------------|--------------|
| 6             | 8.075508826  | 0.106347308  | -1.616068720 |
| 6             | 8.299384617  | -0.993289753 | -0.790570257 |
| 6             | 7.339953403  | -1.379467164 | 0.141482298  |
| 6             | 6.155699012  | -0.648845233 | 0.286357249  |
| 6             | 5.942246266  | 0.468660063  | -0.535984855 |
| 6             | 6.887938399  | 0.826659918  | -1.494102815 |
| 7             | 5.196792339  | -1.025338674 | 1.239321237  |
| 6             | 3.826193821  | -0.841798372 | 1.038989728  |
| 6             | 3.351174217  | 0.253720650  | 0.298954941  |
| 16            | 4.503249959  | 1.497549215  | -0.269300674 |
| 6             | 2.894553540  | -1.737769867 | 1.575439920  |
| 6             | 1.532170779  | -1.544911266 | 1.386822648  |
| 6             | 1.049897685  | -0.466944305 | 0.631967808  |
| 6             | 1.988670883  | 0.420261325  | 0.083029254  |
| 6             | -0.402610437 | -0.266834093 | 0.413444017  |
| 6             | -1.271752828 | -1.353142220 | 0.266895538  |
| 6             | -2.634841093 | -1.129122631 | 0.043596302  |
| 7             | -3.150207340 | 0.108987753  | -0.009778097 |

|   |              |              |              |
|---|--------------|--------------|--------------|
| 6 | -2.336448415 | 1.165070329  | 0.143190818  |
| 6 | -0.959534235 | 1.014313425  | 0.342317477  |
| 6 | -3.589461737 | -2.257934698 | -0.128401136 |
| 6 | -2.967935528 | 2.510582486  | 0.070680557  |
| 6 | -4.164346740 | 2.688593759  | -0.638586413 |
| 6 | -4.762448971 | 3.939672453  | -0.728723158 |
| 6 | -4.199504964 | 5.060895679  | -0.106489268 |
| 6 | -3.010092418 | 4.880395632  | 0.606918213  |
| 6 | -2.403269166 | 3.630946651  | 0.695309769  |
| 6 | -3.179349121 | -3.511221405 | -0.603609612 |
| 6 | -4.090776883 | -4.551976176 | -0.755040762 |
| 6 | -5.442474127 | -4.385541793 | -0.435655338 |
| 6 | -5.851381188 | -3.130239715 | 0.030951006  |
| 6 | -4.946745018 | -2.085575604 | 0.178792368  |
| 6 | -4.869883071 | 6.410692435  | -0.180153021 |
| 6 | -6.422669357 | -5.524794157 | -0.569428762 |
| 1 | 8.813654625  | 0.402791642  | -2.351294414 |
| 1 | 9.216325332  | -1.564222817 | -0.877958540 |
| 1 | 7.505596306  | -2.249565755 | 0.767976299  |
| 1 | 6.699441282  | 1.681587738  | -2.133255972 |

|   |              |              |              |
|---|--------------|--------------|--------------|
| 1 | 5.435511848  | -1.853436568 | 1.766908256  |
| 1 | 3.245625978  | -2.585048732 | 2.154777737  |
| 1 | 0.837858028  | -2.238950332 | 1.844569896  |
| 1 | 1.655258592  | 1.251365338  | -0.526890810 |
| 1 | -0.888893258 | -2.363252348 | 0.316818409  |
| 1 | -0.328431938 | 1.886016090  | 0.448578729  |
| 1 | -4.612323306 | 1.832032401  | -1.125706548 |
| 1 | -5.681152963 | 4.050035956  | -1.296241188 |
| 1 | -2.552713409 | 5.728719330  | 1.105862968  |
| 1 | -1.493188873 | 3.531317609  | 1.275244006  |
| 1 | -2.146510692 | -3.675501047 | -0.887716611 |
| 1 | -3.746265815 | -5.507133554 | -1.138158655 |
| 1 | -6.895058002 | -2.968801035 | 0.281799874  |
| 1 | -5.281229718 | -1.120340538 | 0.536829665  |
| 1 | -5.625873150 | 6.515071801  | 0.605986665  |
| 1 | -4.149655033 | 7.221316996  | -0.050952267 |
| 1 | -5.376712053 | 6.551020875  | -1.137733752 |
| 1 | -6.510070864 | -6.077804808 | 0.372402877  |
| 1 | -7.420691775 | -5.163206814 | -0.827373926 |
| 1 | -6.105791882 | -6.234764443 | -1.336418663 |



**Cartesian coordinates of the optimized structures of PhPz.**

| <b>atomic number</b> | <b>X-coordinate</b> | <b>Y-coordinate</b> | <b>Z-coordinate</b> |
|----------------------|---------------------|---------------------|---------------------|
| 6                    | -7.674299178        | 0.240232860         | 1.570746832         |
| 6                    | -7.901480580        | -0.869206742        | 0.759375739         |
| 6                    | -6.937894954        | -1.277724530        | -0.158773154        |
| 6                    | -5.745758362        | -0.560140717        | -0.303918111        |
| 6                    | -5.528643921        | 0.566928066         | 0.504156268         |
| 6                    | -6.479009060        | 0.947638515         | 1.448766528         |
| 7                    | -4.782277333        | -0.959400300        | -1.243044385        |
| 6                    | -3.411990727        | -0.786139022        | -1.033736950        |
| 6                    | -2.932680311        | 0.314798217         | -0.304307269        |
| 16                   | -4.077257638        | 1.577811645         | 0.235815102         |
| 6                    | -2.484555670        | -1.698113430        | -1.550319299        |
| 6                    | -1.122191018        | -1.516591764        | -1.351445191        |
| 6                    | -0.636148699        | -0.433687663        | -0.606134205        |
| 6                    | -1.570634234        | 0.470627467         | -0.078111396        |
| 6                    | 0.815921842         | -0.246375326        | -0.375703749        |
| 6                    | 1.672165266         | -1.339807642        | -0.206410919        |
| 6                    | 3.034692021         | -1.127131808        | 0.028083326         |
| 7                    | 3.563718121         | 0.105132467         | 0.070617939         |

|   |              |              |              |
|---|--------------|--------------|--------------|
| 6 | 2.762778520  | 1.167048309  | -0.104079381 |
| 6 | 1.386689528  | 1.029350954  | -0.314958173 |
| 6 | 3.975999015  | -2.264579143 | 0.225902996  |
| 6 | 3.408728910  | 2.507727590  | -0.042516269 |
| 6 | 4.590978069  | 2.679888349  | 0.692157010  |
| 6 | 5.204871277  | 3.925812676  | 0.771107631  |
| 6 | 4.654545020  | 5.023686628  | 0.109549030  |
| 6 | 3.485703478  | 4.863280754  | -0.632704613 |
| 6 | 2.867527378  | 3.617568040  | -0.707571700 |
| 6 | 3.543295785  | -3.499090889 | 0.731732959  |
| 6 | 4.439206928  | -4.551168758 | 0.904884470  |
| 6 | 5.783737942  | -4.389968032 | 0.574551499  |
| 6 | 6.226905737  | -3.164871276 | 0.075993444  |
| 6 | 5.333539762  | -2.111713706 | -0.092313497 |
| 1 | -8.415883994 | 0.554171211  | 2.295169658  |
| 1 | -8.824416291 | -1.430316573 | 0.847186073  |
| 1 | -7.106179299 | -2.155408628 | -0.773904777 |
| 1 | -6.287911301 | 1.809930175  | 2.077167692  |
| 1 | -5.024888940 | -1.792059923 | -1.761567074 |
| 1 | -2.838810120 | -2.549091074 | -2.122174878 |

|   |              |              |              |
|---|--------------|--------------|--------------|
| 1 | -0.430864788 | -2.223482746 | -1.793745982 |
| 1 | -1.234377616 | 1.306552752  | 0.523637852  |
| 1 | 1.279416119  | -2.346506106 | -0.247486306 |
| 1 | 0.766592156  | 1.906719547  | -0.438116735 |
| 1 | 5.015045275  | 1.824439766  | 1.201808899  |
| 1 | 6.113492575  | 4.041158134  | 1.351494204  |
| 1 | 5.134069976  | 5.994146278  | 0.168948834  |
| 1 | 3.056942930  | 5.707175308  | -1.161336296 |
| 1 | 1.972429978  | 3.508722519  | -1.308448233 |
| 1 | 2.507303783  | -3.637216708 | 1.017579084  |
| 1 | 4.086950789  | -5.494863945 | 1.305911129  |
| 1 | 6.480363012  | -5.209831584 | 0.708025237  |
| 1 | 7.270950542  | -3.030345063 | -0.184045413 |
| 1 | 5.673813645  | -1.158672709 | -0.476182623 |

## 8. Cyclic voltammetry graphs

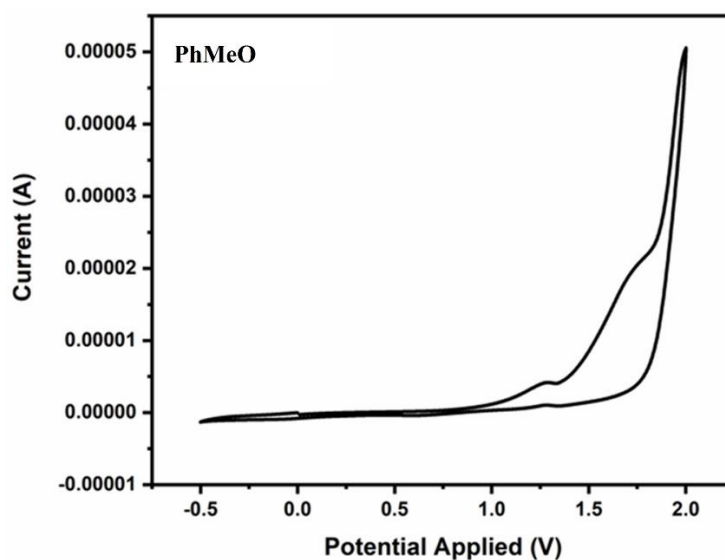

**Fig. S16.** Cyclic Voltammetry graph of **PhMeO** (Ag/AgCl (reference electrode), 0.1M tetrabutylammonium hexafluorophosphate (supporting electrolyte)).

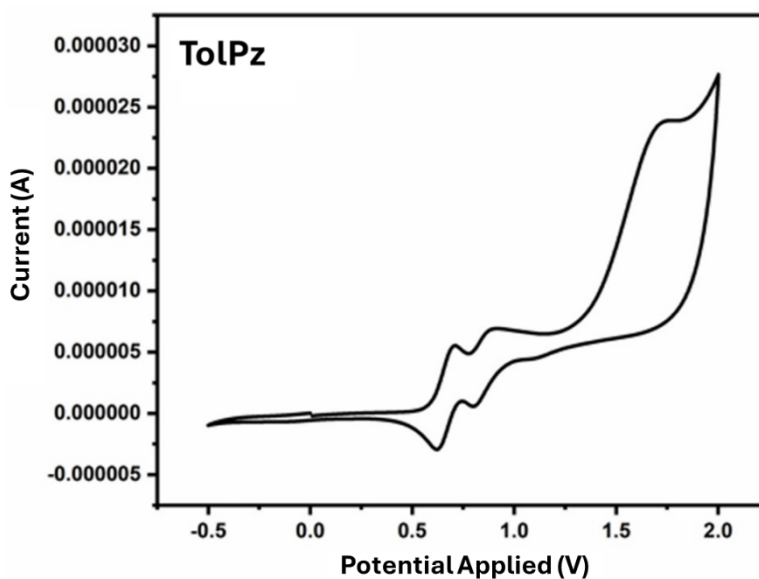

**Fig. S17.** CV graph of **TolPz** (Ag/AgCl (reference electrode), 0.1M tetrabutylammonium hexafluorophosphate (supporting electrolyte)).

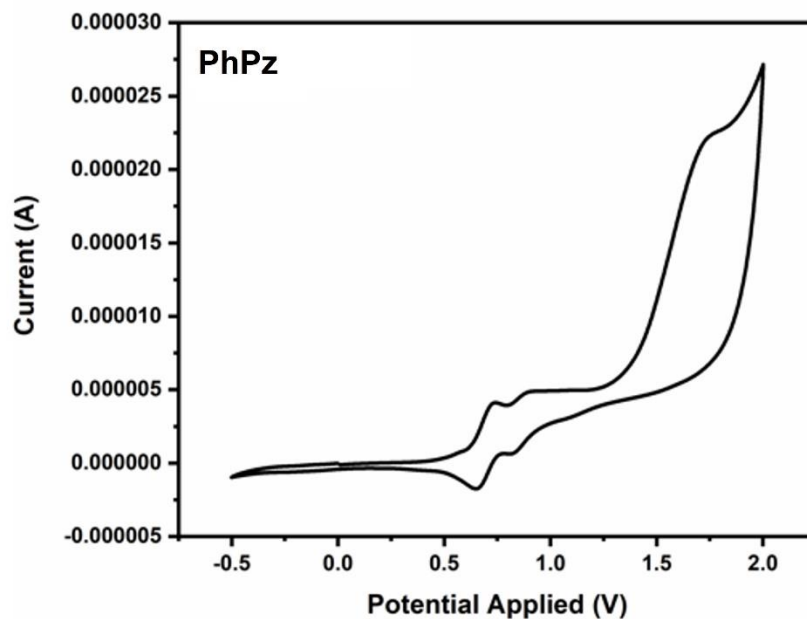

**Fig. S18.** CV graph of **PhPz** (Ag/AgCl (reference electrode), 0.1M tetrabutylammonium hexafluorophosphate (supporting electrolyte)).

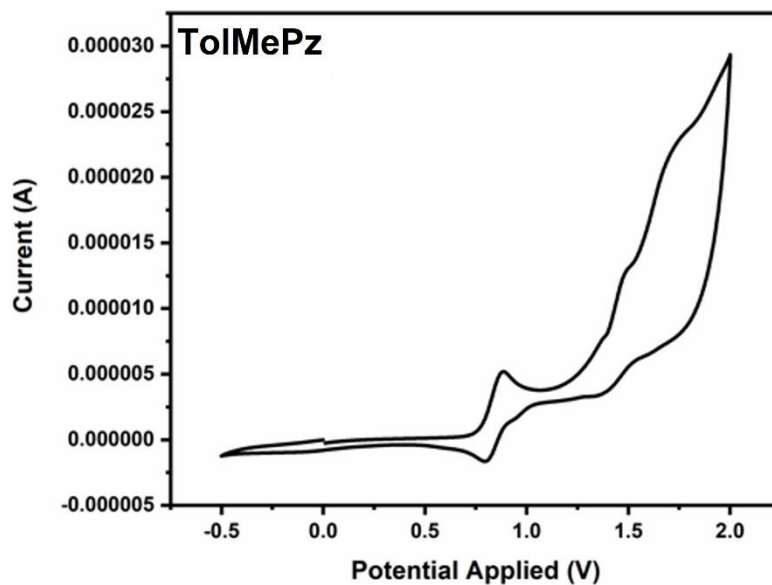

**Fig. S19.** CV graph of **TolMePz** (Ag/AgCl (reference electrode), 0.1M tetrabutylammonium hexafluorophosphate(supporting electrolyte)).

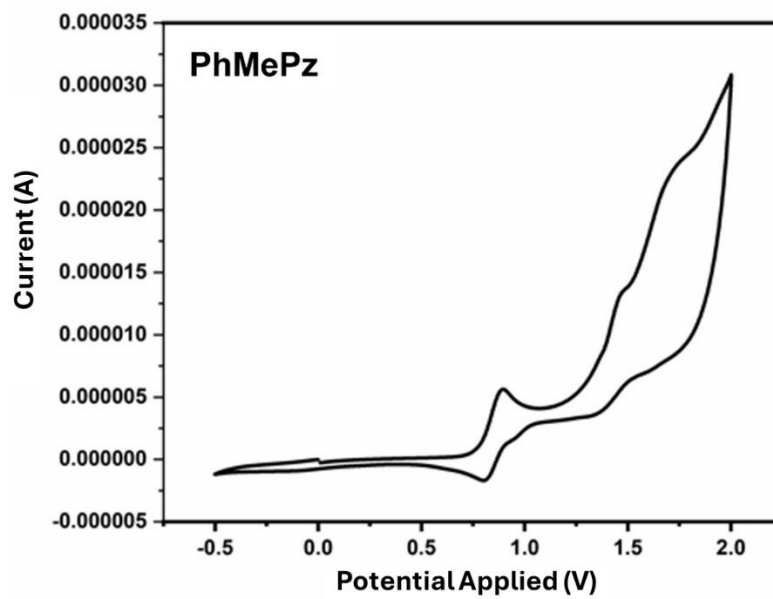

**Fig. S20.** CV graph of **PhMePz** (Ag/AgCl (reference electrode), 0.1M tetrabutylammonium hexafluorophosphate (supporting electrolyte)).

## 9.TGA/DSC graphs

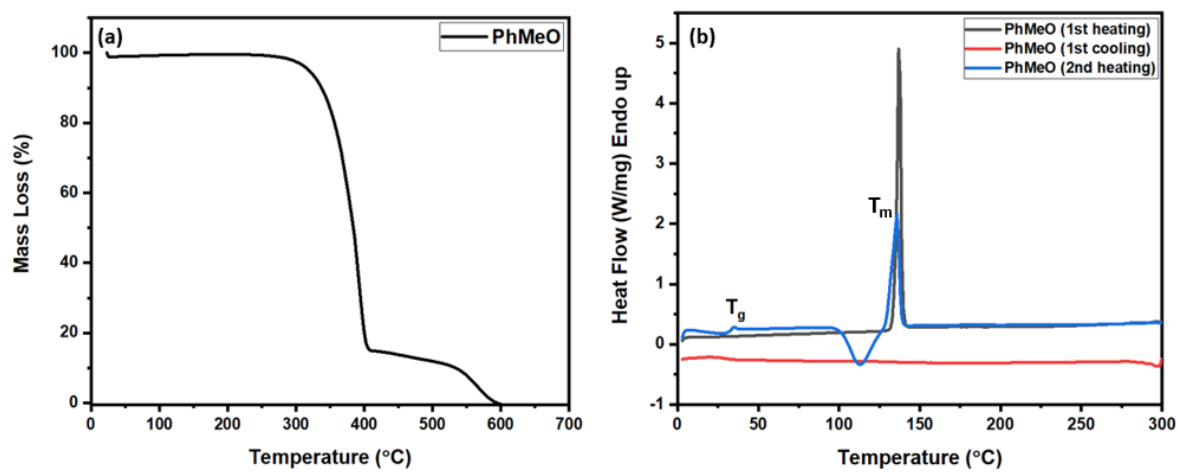

Fig. S21. TGA/DSC graph of PhMeO

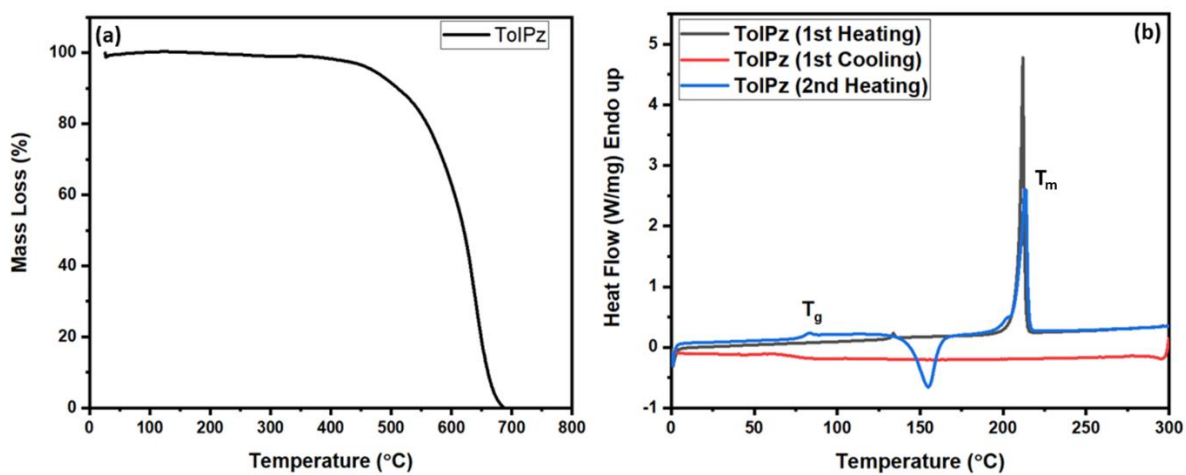

Fig. S22. TGA/DSC graph of TolPz

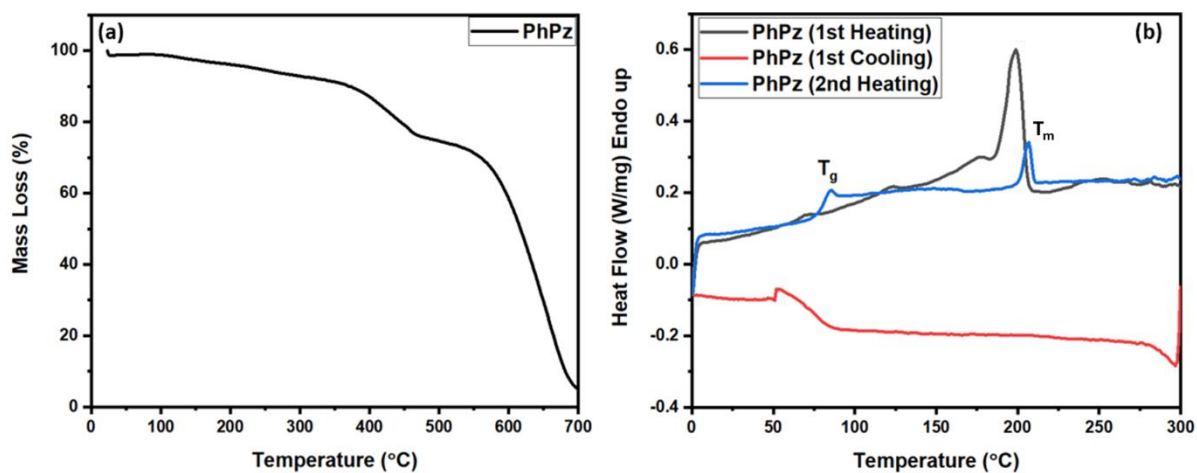

Fig. S23. TGA/DSC graph of **PhPz**

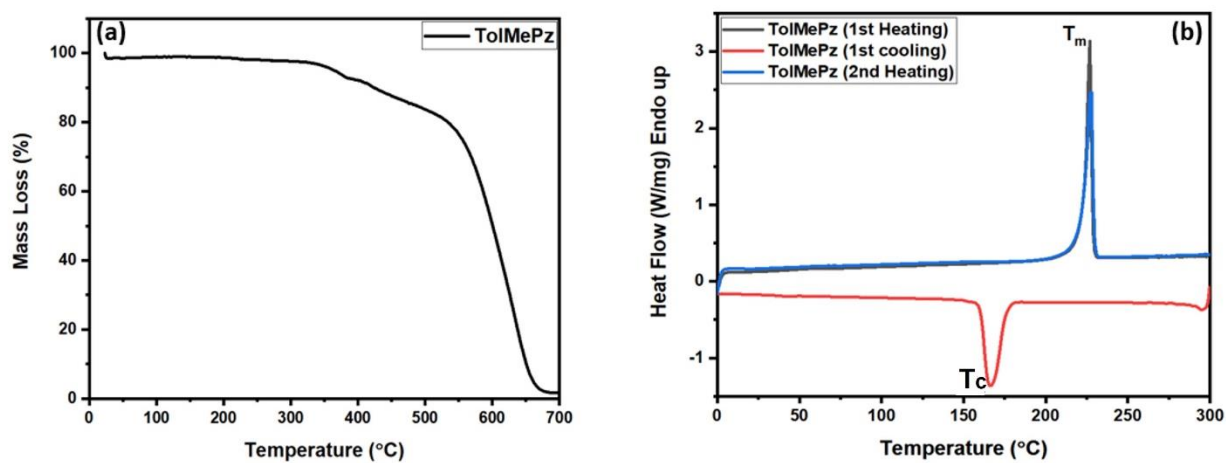

Fig. S24. TGA/DSC graph of **TolMePz**

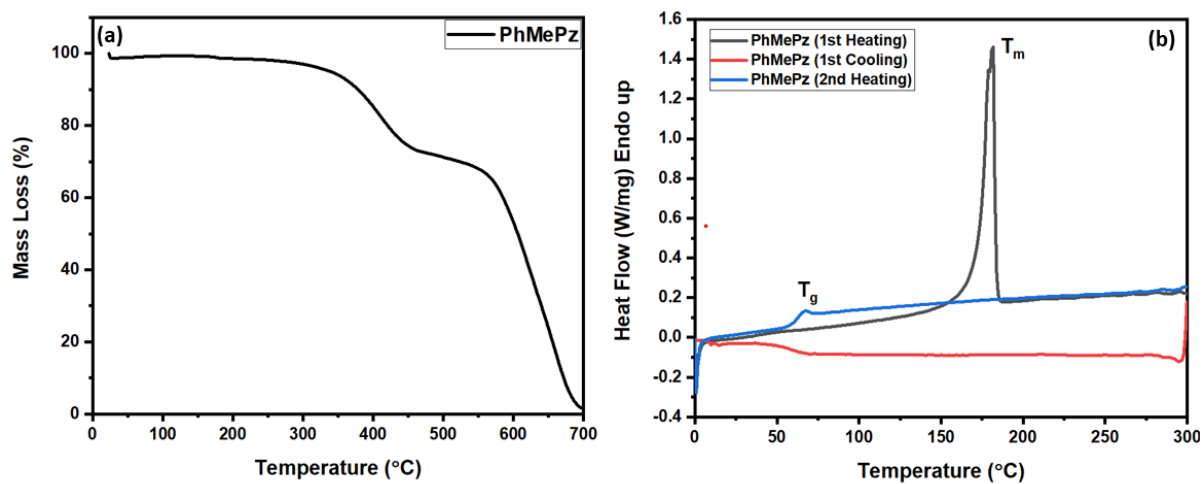

Fig. S25. TGA/DSC graph of **PhMePz**



## 10. Single crystal analysis

Single-crystal X-ray diffraction data of compounds **PhPz**, **TolPz**, and **PhMePz** were collected on an Agilent Supernova X-ray diffractometer equipped with a CCD detector at room temperature (150 or 296 K) using the source graphite-monochromatic Cu K $\alpha$  radiation ( $\lambda = 1.54184\text{\AA}$ ). For single crystal analysis, the same methods and software were used as mentioned in the previous report.<sup>6-10</sup> Compounds **PhPz** and **TolPz** contain disordered DMSO molecules which we have modelled reliably using PART instruction. In **PhPz** the S-atom of the DMSO was disordered with 0.91 in PART 1 and 0.09 in PART 2 whereas in **TolPz** the S and O-atoms of DMSO was disordered with 0.63 in PART 1 and 0.37 in PART 2. Compound **TolPz** contains a disordered DMSO molecules which could be modelled reliably. Crystallographic data is summarized in **Table S10**. These data can be obtained free of charge from The Cambridge Crystallographic Data Centre *via* [www.ccdc.cam.ac.uk/data\\_request/cif](http://www.ccdc.cam.ac.uk/data_request/cif).

**Table S10. Crystal data and structure refinement for PhPz, TolPz, and PhMePz**

| Identification code    | <b>PhPz</b>                                                    | <b>TolPz</b>                                                   | <b>PhMePz</b>                                    |
|------------------------|----------------------------------------------------------------|----------------------------------------------------------------|--------------------------------------------------|
| Empirical formula      | C <sub>31</sub> H <sub>26</sub> N <sub>2</sub> OS <sub>2</sub> | C <sub>33</sub> H <sub>30</sub> N <sub>2</sub> OS <sub>2</sub> | C <sub>30</sub> H <sub>22</sub> N <sub>2</sub> S |
| Formula weight         | 506.66                                                         | 534.75                                                         | 442.58                                           |
| Temperature/K          | 293(2)                                                         | 293(2)                                                         | 293(2)                                           |
| Crystal system         | Monoclinic                                                     | Monoclinic                                                     | triclinic                                        |
| Space group            | P2 <sub>1</sub> /c                                             | P2 <sub>1</sub> /n                                             | P-1                                              |
| a/ $\text{\AA}$        | 16.2678(6)                                                     | 5.8344(2)                                                      | 7.5356(8)                                        |
| b/ $\text{\AA}$        | 21.7983(8)                                                     | 18.1183(6)                                                     | 9.0697(7)                                        |
| c/ $\text{\AA}$        | 7.4971(3)                                                      | 26.5642(7)                                                     | 16.4415(12)                                      |
| $\alpha$ / $^{\circ}$  | 90.00                                                          | 90.00                                                          | 85.207(6)                                        |
| $\beta$ / $^{\circ}$   | 100.634(4)                                                     | 94.910(2)                                                      | 84.755(7)                                        |
| $\gamma$ / $^{\circ}$  | 90.00                                                          | 90.00                                                          | 84.765(7)                                        |
| Volume/ $\text{\AA}^3$ | 2612.89(17)                                                    | 2797.78(15)                                                    | 1111.12(17)                                      |
| Z                      | 4                                                              | 4                                                              | 2                                                |

|                                         |                                                                       |                                                                          |                                                                         |
|-----------------------------------------|-----------------------------------------------------------------------|--------------------------------------------------------------------------|-------------------------------------------------------------------------|
| $\rho_{\text{calc}}/\text{cm}^3$        | 1.288                                                                 | 1.270                                                                    | 1.323                                                                   |
| $\mu/\text{mm}^{-1}$                    | 2.051                                                                 | 1.941                                                                    | 1.445                                                                   |
| F(000)                                  | 1069                                                                  | 1133                                                                     | 465                                                                     |
| Radiation                               | CuK $\alpha$ ( $\lambda = 1.54184$ )                                  | CuK $\alpha$ ( $\lambda = 1.54184$ )                                     | CuK $\alpha$ ( $\lambda = 1.54184$ )                                    |
| Index ranges                            | -19 $\leq$ h $\leq$ 18<br>0 $\leq$ k $\leq$ 25<br>0 $\leq$ l $\leq$ 8 | -6 $\leq$ h $\leq$ 4<br>-21 $\leq$ k $\leq$ 19<br>-28 $\leq$ l $\leq$ 31 | -8 $\leq$ h $\leq$ 8<br>-10 $\leq$ k $\leq$ 9<br>-19 $\leq$ l $\leq$ 19 |
| Reflections collected                   | 8632                                                                  | 8917                                                                     | 6325                                                                    |
| Data/restraints/parameters              | 4596/49/356                                                           | 4888/60/390                                                              | 3877/42/300                                                             |
| Goodness-of-fit on F <sup>2</sup>       | 1.047                                                                 | 1.056                                                                    | 1.003                                                                   |
| Final R indexes [ $I \geq 2\sigma(I)$ ] | R <sub>1</sub> = 0.0486, wR <sub>2</sub> = 0.1296                     | R <sub>1</sub> = 0.0455, wR <sub>2</sub> = 0.1211                        | R <sub>1</sub> = 0.0430, wR <sub>2</sub> = 0.1028                       |
| Final R indexes [all data]              | R <sub>1</sub> = 0.0613, wR <sub>2</sub> = 0.1435                     | R <sub>1</sub> = 0.0591, wR <sub>2</sub> = 0.1322                        | R <sub>1</sub> = 0.0710, wR <sub>2</sub> = 0.1314                       |
| CCDC No.                                | 2248255                                                               | 2248257                                                                  | 2248258                                                                 |

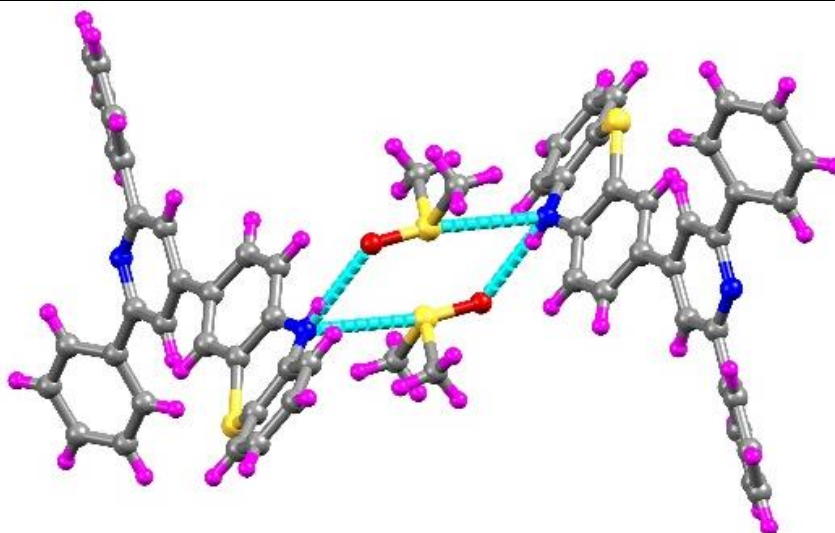

A

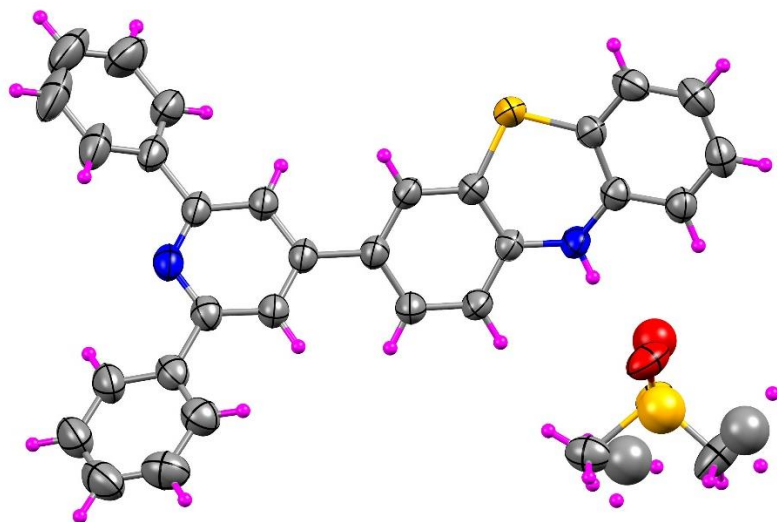

B

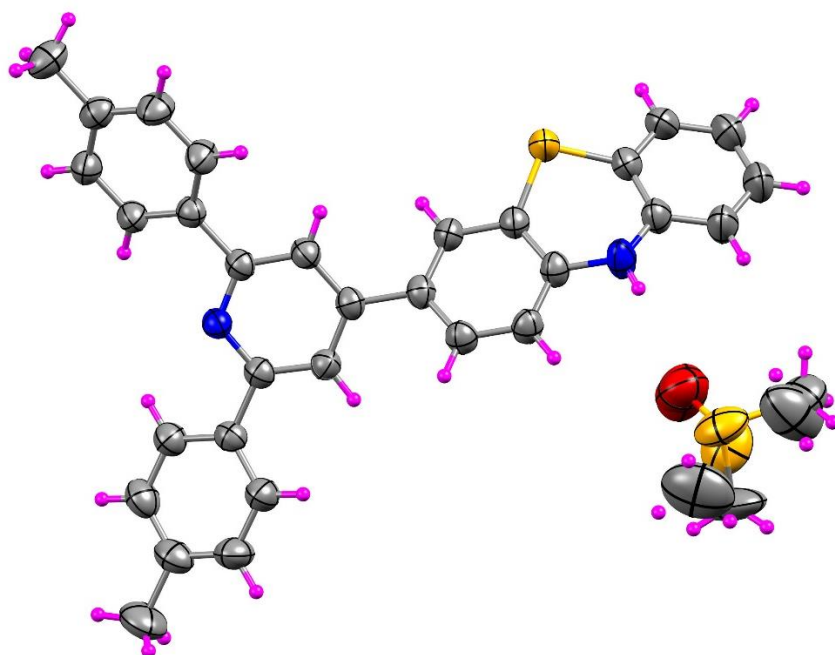

C

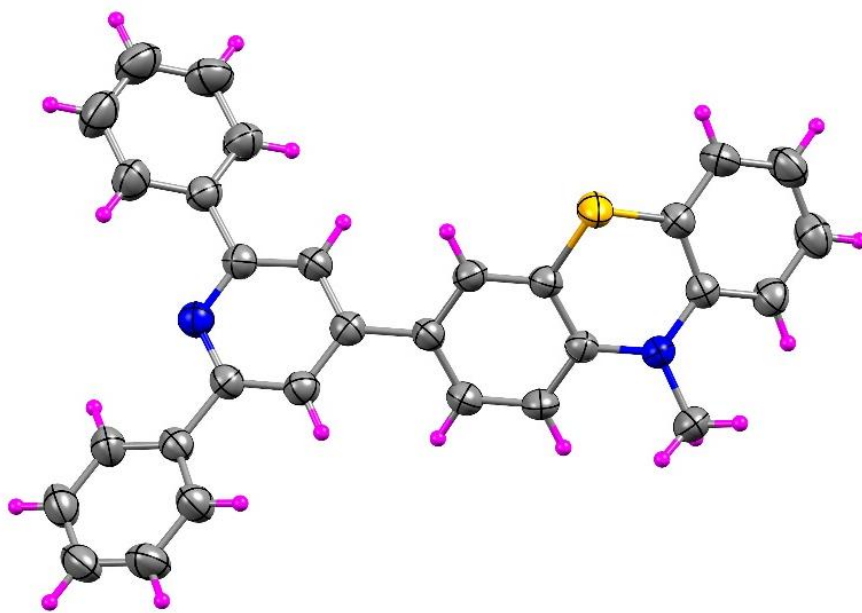

D

**Fig. S26:** (A) Cyclic hydrogen-bonded network between **PhPz** and DMSO molecules. ORTEP drawings of **PhPz** (B), **TolPz** (C) and **PhMePZ** (D) with ellipsoid contour probability level of 50%.

## 11.Hole-only device fabrication

The HODs were consisted of ~125 nm indium tin oxide (ITO) as anode layer, ~40 nm poly(3,4-ethylenedioxythiophene): polystyrene sulphonate (PEDOT:PSS) as hole injection layer (HIL), ~10 nm hole transport layer (HTL), ~1 nm lithium fluoride (LiF) as electron injection layer (EIL), and ~100 nm aluminum (Al) as cathode layer.

Before fabricating the device, the ITO-coated glass substrate was first cleaned in acetone at 45°C for 30 mins and then in 2-propanol at 60°C for 60 mins (both under an ultrasonic bath), followed by treating them in an ozone atmosphere under ultraviolet light for 15 min. After cleaning, the substrate was transferred into a nitrogen-filled glove box to coat the HIL and HTL via spin-coating. The HIL was spin-coated at 4,000 rpm for 20 seconds, then heated at 120 °C for 10 min, and then cooled down for 10 minutes. After dissolving the compounds in toluene, they were spin-coated onto the specimen at 2,500 rpm for 20 seconds for coating the HTL and then heated at 120 °C for 10 min, and then cooled down for 10 minutes. After coating the HTL, the coated substrate was transferred into a high-vacuum chamber with a base pressure of  $\sim 1 \times 10^{-7}$  torr. The EIL and cathode were sequentially deposited via thermal evaporation. The current density of the fabricated device was measured using a Keithley 2400 electrometer.

## 12. References

- (1) F. Liu, J. Du, D. Song, M. Xu, G. Suna, Sensitive Fluorescent Sensor for the Detection of Endogenous Hydroxyl Radicals in Living Cells and Bacteria and Direct Imaging with Respect to Its Ecotoxicity in Living Zebra Fish. *Chem. Commun.* 2016, **52**, 4636–4639.
- (2) J. Liaw, K.-L. Wang, S.-P. Pujari, Y.-C. Huang, B.-C. Tao, M.-H. Chen, K.-R. Lee, J.-Y. Lai. A Novel, Conjugated Polymer Containing Fluorene, Pyridine and Unsymmetric Carbazole Moieties: Synthesis, Protonation and Electrochemical Properties. *Dye. Pigment.* 2009, **82**, 109–117.
- (3) M. Li, T. Wang, C. Wang. Multicomponent Reaction of Pyridinium Salts,  $\beta$ -Nitrostyrenes and Ammonium Acetate under the DBU/Acetic Acid System: Access to 2,4,6-Triarylpyridine Derivatives. *Chem. Select.* 2020, **5**, 3600–3604.
- (4) J.-V. Allan, G. Reynolds. Synthesis of some phenothiazinyl and carbazolyl pyrylium salts. *J. Hetro. Chem.* 1976, **13**, 73-76.
- (5) M. J. Frisch, G. W. Trucks, H. B. Schlegel, G. E. Scuseria, M. A. Robb, J. R. Cheeseman, G. Scalmani, V. Barone, B. Mennucci, G. A. Petersson, H. Nakatsuji, M. Caricato, X. Li, H. P. Hratchian, A. F. Izmaylov, J. Bloino, G. Zheng, J. L. Sonnenberg, M. Hada, M. Ehara, K. Toyota, R. Fukuda, J. Hasegawa, M. Ishida, T. Nakajima, Y. Honda, O. Kitao, H. Nakai, T. Vreven, J. A. Montgomery, J. E. Peralta, F. Ogliaro, M. Bearpark, J. J. Heyd, E. Brothers, K. N. Kudin, V. N. Staroverov, R. Kobayashi, J. Normand, K. Raghavachari, A. Rendell, J. C. Burant, S. S. Iyengar, J. Tomasi, M. Cossi, N. Rega, J. M. Millam, M. Klene, J. E. Knox, J. B. Cross, V. Bakken, C. Adamo, J. Jaramillo, R. Gomperts, R. E. Stratmann, O. Yazyev, A. J. Austin, R. Cammi, C. Pomelli, J. W. Ochterski, R. L. Martin, K. Morokuma, V. G. Zakrzewski, G. A. Voth, P. Salvador, J. J. Dannenberg, S.

- Dapprich, A. D. Daniels, O. Farkas, J. B. Foresman, J. V. Ortiz, J. Cioslowski and D. J. Fox, Gaussian, Inc., Wallingford CT, 2016.
- (6) A. Karmakar, M. M.-A. Soliman, G. M.-D. M. Rúbio, M. F.C. G. da Silva, A. J. L. Pombeiro. Synthesis and catalytic activities of a Zn(II) based metallomacrocyclic and a metal–organic framework towards one-pot deacetalization-Knoevenagel tandem reactions under different strategies: a comparative study. *Dalton Trans.*, 2020, **49**, 8075–8085.
- (7) Crys AlisPro Program, ver. 171.37.33c. Data Collection and Processing Software for Agilent X-ray Diffractometers; Agilent Technologies: Oxford, UK, **2012**, 1–49
- (8) G. M. Sheldrick. SADABS. Program for Empirical Absorption Correction. University of Gottingen, Germany, **1996**.
- (9) G. M. Sheldrick. Crystal structure refinement with *SHELXL*. *Acta Crystallogr.* 2015, **C71**, 3–8.
- (10) L. J. Farrugia. WinGX and ORTEP for Windows: an update. *J. Appl. Crystallogr.* 2012, **45**, 849–854.
